# Supplementary material
Source: PubMed Central journal article supplement (PMC3770102)
Supplement: supp_P035808_jlrP035808_SUPP_material_JLR_finalR.pdf [file supp_P035808_jlrP035808_SUPP_material_JLR_finalR.pdf]

## SUPPLEMENTARY MATERIAL

### PLASMA LIPID PROFILING IN A LARGE POPULATION BASED COHORT

Jacquelyn M Weir<sup>1,2</sup>, Gerard Wong<sup>1,2</sup>, Christopher K Barlow<sup>1</sup>, Melissa A Greeve<sup>1</sup>, Adam Kowalczyk<sup>3</sup>,  
Laura Almasy<sup>4</sup>, Anthony G. Comuzzie<sup>4</sup>, Michael C. Mahaney<sup>4</sup>, Jeremy B M Jowett<sup>1</sup>, Jonathan Shaw<sup>1</sup>,  
Joanne E. Curran<sup>4</sup>, John Blangero<sup>4</sup>, Peter J Meikle<sup>1</sup>

<sup>1</sup> Baker IDI Heart and Diabetes Institute, Melbourne, Australia. <sup>3</sup> National ICT Australia (NICTA)  
University of Melbourne, Melbourne, Australia. <sup>4</sup> Department of Genetics, Texas Biomedical Research  
Institute, San Antonio, USA.

<sup>2</sup> JMW and GW contributed equally to this work.

**Address for correspondence:** Peter J Meikle, Baker IDI Heart and Diabetes Institute, 75 Commercial  
Road, Melbourne, Victoria 3004, Australia. Tel: (613) 8532 1770, Fax: (613) 8532 1100, Email:  
peter.meikle@bakeridi.edu.au

**Supplementary Table 1: Tandem mass spectrometry parameters for analysis of lipid species identified in human plasma**

| Lipid species                | Isotope monitored <sup>a</sup> | Retention Time <sup>b</sup> | Q1 <sup>c</sup> | Q3 <sup>d</sup> | Correction Factor |
|------------------------------|--------------------------------|-----------------------------|-----------------|-----------------|-------------------|
| dhCer 8:0 (IS) <sup>e</sup>  | [M+H] <sup>+</sup>             | 5.6                         | 428.4           | 284.3           | -                 |
| dhCer 16:0                   | [M+H] <sup>+</sup>             | 7.0                         | 540.5           | 284.3           | -                 |
| dhCer 18:0                   | [M+H] <sup>+</sup>             | 7.3                         | 568.6           | 284.3           | -                 |
| dhCer 20:0                   | [M+H] <sup>+</sup>             | 7.6                         | 596.6           | 284.3           | -                 |
| dhCer 22:0                   | [M+H] <sup>+</sup>             | 7.8                         | 624.6           | 284.3           | -                 |
| dhCer 24:0                   | [M+H] <sup>+</sup>             | 8.0                         | 652.7           | 284.3           | -                 |
| dhCer 24:1                   | [M+H] <sup>+</sup>             | 7.8                         | 650.7           | 284.3           | -                 |
| Cer 17:0 (IS) <sup>e</sup>   | [M+H] <sup>+</sup>             | 7.1                         | 552.5           | 264.3           | -                 |
| Cer 16:0                     | [M+H] <sup>+</sup>             | 6.9                         | 538.5           | 264.3           | -                 |
| Cer 18:0                     | [M+H] <sup>+</sup>             | 7.2                         | 566.6           | 264.3           | -                 |
| Cer 20:0                     | [M+H] <sup>+</sup>             | 7.5                         | 594.6           | 264.3           | -                 |
| Cer 22:0                     | [M+H] <sup>+</sup>             | 7.7                         | 622.6           | 264.3           | -                 |
| Cer 24:0                     | [M+H] <sup>+</sup>             | 8.0                         | 650.7           | 264.3           | -                 |
| Cer 24:1                     | [M+H] <sup>+</sup>             | 7.7                         | 648.6           | 264.3           | -                 |
| MHC 16:0d3 (IS) <sup>e</sup> | [M+H] <sup>+</sup>             | 6.2                         | 703.6           | 264.3           | -                 |
| MHC 16:0                     | [M+H] <sup>+</sup>             | 6.2                         | 700.6           | 264.3           | -                 |
| MHC 18:0                     | [M+H] <sup>+</sup>             | 6.5                         | 728.6           | 264.3           | -                 |
| MHC 20:0                     | [M+H] <sup>+</sup>             | 6.8                         | 756.6           | 264.3           | -                 |
| MHC 22:0                     | [M+H] <sup>+</sup>             | 7.1                         | 784.7           | 264.3           | -                 |
| MHC 24:0                     | [M+H] <sup>+</sup>             | 7.4                         | 812.7           | 264.3           | -                 |
| MHC 24:1                     | [M+H] <sup>+</sup>             | 7.1                         | 810.7           | 264.3           | -                 |
| DHC 16:0d3 (IS) <sup>e</sup> | [M+H] <sup>+</sup>             | 5.9                         | 865.6           | 264.3           | -                 |
| DHC 16:0                     | [M+H] <sup>+</sup>             | 5.9                         | 862.6           | 264.3           | -                 |
| DHC 18:0                     | [M+H] <sup>+</sup>             | 6.2                         | 890.7           | 264.3           | -                 |
| DHC 20:0                     | [M+H] <sup>+</sup>             | 6.5                         | 918.7           | 264.3           | -                 |
| DHC 22:0                     | [M+H] <sup>+</sup>             | 6.8                         | 946.7           | 264.3           | -                 |
| DHC 24:0                     | [M+H] <sup>+</sup>             | 7.1                         | 974.8           | 264.3           | -                 |
| DHC 24:1                     | [M+H] <sup>+</sup>             | 6.8                         | 972.7           | 264.3           | -                 |
| THC 17:0 (IS) <sup>e</sup>   | [M+H] <sup>+</sup>             | 5.9                         | 1038.7          | 264.3           | -                 |
| THC 16:0                     | [M+H] <sup>+</sup>             | 5.7                         | 1024.7          | 264.3           | -                 |
| THC 18:0                     | [M+H] <sup>+</sup>             | 6.0                         | 1052.7          | 264.3           | -                 |
| THC 20:0                     | [M+H] <sup>+</sup>             | 6.3                         | 1080.7          | 264.3           | -                 |
| THC 22:0                     | [M+H] <sup>+</sup>             | 6.6                         | 1108.8          | 264.3           | -                 |
| THC 24:0                     | [M+H] <sup>+</sup>             | 6.9                         | 1136.8          | 264.3           | -                 |
| THC 24:1                     | [M+H] <sup>+</sup>             | 6.6                         | 1134.8          | 264.3           | -                 |
| GM3 16:0                     | [M+H] <sup>+</sup>             | 4.8                         | 1153.7          | 264.3           | -                 |
| GM3 18:0                     | [M+H] <sup>+</sup>             | 5.1                         | 1181.8          | 264.3           | -                 |
| GM3 20:0                     | [M+H] <sup>+</sup>             | 5.5                         | 1209.8          | 264.3           | -                 |
| GM3 22:0                     | [M+H] <sup>+</sup>             | 5.8                         | 1237.8          | 264.3           | -                 |
| GM3 24:0                     | [M+H] <sup>+</sup>             | 6.1                         | 1265.9          | 264.3           | -                 |
| GM3 24:1                     | [M+H] <sup>+</sup>             | 5.8                         | 1263.8          | 264.3           | -                 |
| SM 12:0 (IS) <sup>e</sup>    | [M+H] <sup>+</sup>             | 4.8                         | 647.5           | 184.1           | -                 |

| Lipid species                     | Isotope monitored <sup>a</sup>    | Retention Time <sup>b</sup> | Q1 <sup>c</sup> | Q3 <sup>d</sup> | Correction Factor |
|-----------------------------------|-----------------------------------|-----------------------------|-----------------|-----------------|-------------------|
| SM 12:0 +1 (IS) <sup>e</sup>      | [M+1+H] <sup>+</sup>              | 4.8                         | 648.5           | 185.1           | -                 |
| SM 12:0 +2 (IS) <sup>e</sup>      | [M+2+H] <sup>+</sup>              | 4.8                         | 649.5           | 186.1           | -                 |
| SM 32:1                           | [M+1+H] <sup>+</sup>              | 5.2                         | 676.6           | 185.1           | -                 |
| SM 32:2                           | [M+H] <sup>+</sup>                | 4.9                         | 673.5           | 184.1           | -                 |
| SM 34:1                           | M+2+H] <sup>+</sup>               | 5.6                         | 705.6           | 186.1           | -                 |
| SM 34:2                           | [M+1+H] <sup>+</sup>              | 5.3                         | 702.6           | 185.1           | -                 |
| SM 34:3                           | [M+H] <sup>+</sup>                | 5.1                         | 699.5           | 184.1           | -                 |
| SM 36:1                           | [M+1+H] <sup>+</sup>              | 6.0                         | 732.6           | 185.1           | -                 |
| SM 36:2                           | [ <sup>13</sup> C+H] <sup>+</sup> | 5.8                         | 730.6           | 185.1           | -                 |
| SM 36:3                           | [M+H] <sup>+</sup>                | 5.5                         | 727.6           | 184.1           | -                 |
| SM 38:1                           | [M+1+H] <sup>+</sup>              | 6.3                         | 760.6           | 185.1           | -                 |
| SM 38:2                           | [M+1+H] <sup>+</sup>              | 6.1                         | 758.6           | 185.1           | -                 |
| SM 42:1                           | [M+1+H] <sup>+</sup>              | 6.9                         | 816.7           | 185.1           | -                 |
| SM 31:1                           | [M+H] <sup>+</sup>                | 5.0                         | 661.5           | 184.1           | -                 |
| SM 33:1                           | [M+1+H] <sup>+</sup>              | 5.4                         | 690.6           | 185.1           | -                 |
| SM 35:1                           | [M+H] <sup>+</sup>                | 5.8                         | 717.6           | 184.1           | -                 |
| SM 35:2                           | [M+H] <sup>+</sup>                | 5.6                         | 715.6           | 184.1           | -                 |
| SM 37:2                           | [M+H] <sup>+</sup>                | 5.9                         | 743.5           | 184.1           | -                 |
| SM 39:1                           | [M+1+H] <sup>+</sup>              | 6.5                         | 774.7           | 185.1           | -                 |
| SM 41:1                           | [M+1+H] <sup>+</sup>              | 6.7                         | 802.7           | 185.1           | -                 |
| SM 41:2                           | [M+1+H] <sup>+</sup>              | 6.5                         | 800.7           | 185.1           | -                 |
| PC 13:0/13:0 (IS) <sup>e</sup>    | [M+H] <sup>+</sup>                | 5.0                         | 650.5           | 184.1           | -                 |
| PC 13:0/13:0 +1 (IS) <sup>e</sup> | [M+1+H] <sup>+</sup>              | 5.0                         | 651.5           | 185.1           | -                 |
| PC 13:0/13:0 +2 (IS) <sup>e</sup> | [M+2+H] <sup>+</sup>              | 5.0                         | 652.5           | 186.1           | -                 |
| PC 28:0                           | [M+H] <sup>+</sup>                | 5.5                         | 678.5           | 184.1           | -                 |
| PC 29:0                           | [M+H] <sup>+</sup>                | 5.1                         | 692.5           | 184.1           | -                 |
| PC 30:0                           | [M+H] <sup>+</sup>                | 5.9                         | 706.5           | 184.1           | -                 |
| PC 31:0                           | [M+H] <sup>+</sup>                | 6.0                         | 720.6           | 184.1           | -                 |
| PC 32:0                           | [M+1+H] <sup>+</sup>              | 6.2                         | 735.6           | 185.1           | -                 |
| PC 33:0                           | [M+H] <sup>+</sup>                | 6.4                         | 748.6           | 184.1           | -                 |
| PC 33:1                           | [M+H] <sup>+</sup>                | 6.2                         | 746.6           | 184.1           | -                 |
| PC 33:2                           | [M+H] <sup>+</sup>                | 5.9                         | 744.6           | 184.1           | -                 |
| PC 33:3                           | [M+H] <sup>+</sup>                | 5.8                         | 742.5           | 184.1           | -                 |
| PC 34:0                           | [M+H] <sup>+</sup>                | 6.5                         | 762.6           | 184.1           | -                 |
| PC 34:1                           | [M+1+H] <sup>+</sup>              | 6.3                         | 761.6           | 185.1           | -                 |
| PC 34:2                           | [M+2+H] <sup>+</sup>              | 6.1                         | 760.6           | 186.1           | -                 |
| PC 34:3                           | [M+1+H] <sup>+</sup>              | 5.9                         | 757.6           | 185.1           | -                 |
| PC 34:4                           | [M+H] <sup>+</sup>                | 5.8                         | 754.5           | 184.1           | -                 |
| PC 34:5                           | [M+H] <sup>+</sup>                | 5.6                         | 752.5           | 184.1           | -                 |
| PC 35:0                           | [M+H] <sup>+</sup>                | 6.6                         | 776.6           | 184.1           | -                 |
| PC 35:2                           | [M+1+H] <sup>+</sup>              | 6.3                         | 773.6           | 185.1           | -                 |
| PC 35:3                           | [M+H] <sup>+</sup>                | 6.0                         | 770.6           | 184.1           | -                 |
| PC 35:4                           | [M+1+H] <sup>+</sup>              | 6.0                         | 769.6           | 185.1           | -                 |
| PC 35:5                           | [M+1+H] <sup>+</sup>              | 5.8                         | 767.5           | 185.1           | -                 |
| PC 36:2                           | [M+2+H] <sup>+</sup>              | 6.4                         | 788.6           | 186.1           | -                 |

| Lipid species         | Isotope monitored <sup>a</sup> | Retention Time <sup>b</sup> | Q1 <sup>c</sup> | Q3 <sup>d</sup> | Correction Factor |
|-----------------------|--------------------------------|-----------------------------|-----------------|-----------------|-------------------|
| PC 36:3               | [M+1+H] <sup>+</sup>           | 6.2                         | 785.6           | 185.1           | -                 |
| PC 36:4a <sup>f</sup> | [M+2+H] <sup>+</sup>           | 6.0                         | 784.6           | 186.1           | -                 |
| PC 36:4b <sup>f</sup> | [M+2+H] <sup>+</sup>           | 6.1                         | 784.6           | 186.1           | -                 |
| PC 36:5               | [M+1+H] <sup>+</sup>           | 6.0                         | 781.6           | 185.1           | -                 |
| PC 36:6               | [M+H] <sup>+</sup>             | 5.8                         | 778.5           | 184.1           | -                 |
| PC 37:4               | [M+1+H] <sup>+</sup>           | 6.3                         | 797.6           | 185.1           | -                 |
| PC 37:5               | [M+1+H] <sup>+</sup>           | 6.1                         | 795.6           | 185.1           | -                 |
| PC 37:6               | [M+H] <sup>+</sup>             | 6.0                         | 792.6           | 184.1           | -                 |
| PC 38:2               | [M+1+H] <sup>+</sup>           | 6.7                         | 815.6           | 185.1           | -                 |
| PC 38:3               | [M+1+H] <sup>+</sup>           | 6.5                         | 813.6           | 185.1           | -                 |
| PC 38:4               | [M+2+H] <sup>+</sup>           | 6.5                         | 812.6           | 186.1           | -                 |
| PC 38:5               | [M+1+H] <sup>+</sup>           | 6.2                         | 809.6           | 185.1           | -                 |
| PC 38:6a <sup>f</sup> | [M+1+H] <sup>+</sup>           | 6.0                         | 807.6           | 185.1           | -                 |
| PC 38:6b <sup>f</sup> | [M+1+H] <sup>+</sup>           | 6.1                         | 807.6           | 185.1           | -                 |
| PC 38:7               | [M+H] <sup>+</sup>             | 5.9                         | 804.6           | 184.1           | -                 |
| PC 39:6               | [M+H] <sup>+</sup>             | 6.3                         | 820.6           | 184.1           | -                 |
| PC 40:5               | [M+1+H] <sup>+</sup>           | 6.5                         | 837.6           | 185.1           | -                 |
| PC 40:6               | [M+1+H] <sup>+</sup>           | 6.4                         | 835.6           | 185.1           | -                 |
| PC 40:7               | [M+1+H] <sup>+</sup>           | 6.2                         | 833.6           | 185.1           | -                 |
| PC(O-30:0)            | [M+H] <sup>+</sup>             | 6.0                         | 692.5           | 184.1           | -                 |
| PC(O-32:0)            | [M+H] <sup>+</sup>             | 6.4                         | 720.6           | 184.1           | -                 |
| PC(O-32:1)            | [M+H] <sup>+</sup>             | 6.1                         | 718.5           | 184.1           | -                 |
| PC(O-32:2)            | [M+H] <sup>+</sup>             | 5.9                         | 716.6           | 184.1           | -                 |
| PC(O-34:0)            | [M+H] <sup>+</sup>             | 6.7                         | 748.6           | 184.1           | -                 |
| PC(O-34:1)            | [M+H] <sup>+</sup>             | 6.4                         | 746.6           | 184.1           | -                 |
| PC(O-34:2)            | [M+H] <sup>+</sup>             | 6.2                         | 744.6           | 184.1           | -                 |
| PC(O-34:4)            | [M+H] <sup>+</sup>             | 6.0                         | 740.6           | 184.1           | -                 |
| PC(O-35:4)            | [M+H] <sup>+</sup>             | 6.1                         | 754.5           | 184.1           | -                 |
| PC(O-36:0)            | [M+H] <sup>+</sup>             | 6.9                         | 776.6           | 184.1           | -                 |
| PC(O-36:1)            | [M+1+H] <sup>+</sup>           | 6.7                         | 775.6           | 185.1           | -                 |
| PC(O-36:2)            | [M+1+H] <sup>+</sup>           | 6.5                         | 773.6           | 185.1           | -                 |
| PC(O-36:3)            | [M+H] <sup>+</sup>             | 6.3                         | 770.6           | 184.1           | -                 |
| PC(O-36:4)            | [M+1+H] <sup>+</sup>           | 6.3                         | 769.6           | 185.1           | -                 |
| PC(O-36:5)            | [M+1+H] <sup>+</sup>           | 6.2                         | 767.5           | 185.1           | -                 |
| PC(O-38:4)            | [M+1+H] <sup>+</sup>           | 6.6                         | 797.6           | 185.1           | -                 |
| PC(O-38:5)            | [M+1+H] <sup>+</sup>           | 6.3                         | 795.6           | 185.1           | -                 |
| PC(O-40:7)            | [M+H] <sup>+</sup>             | 6.3                         | 818.6           | 184.1           | -                 |
| PC(P-32:0)            | [M+H] <sup>+</sup>             | 6.3                         | 718.5           | 184.1           | -                 |
| PC(P-32:1)            | [M+H] <sup>+</sup>             | 6.1                         | 716.6           | 184.1           | -                 |
| PC(P-34:1)            | [M+H] <sup>+</sup>             | 6.4                         | 744.6           | 184.1           | -                 |
| PC(P-34:2)            | [M+H] <sup>+</sup>             | 6.2                         | 742.5           | 184.1           | -                 |
| PC(P-36:2)            | [M+H] <sup>+</sup>             | 6.5                         | 770.6           | 184.1           | -                 |
| PC(P-36:5)            | [M+H] <sup>+</sup>             | 6.0                         | 764.6           | 184.1           | -                 |
| PC(P-38:5)            | [M+H] <sup>+</sup>             | 6.3                         | 792.6           | 184.1           | -                 |
| PC(P-40:5)            | [M+H] <sup>+</sup>             | 6.5                         | 820.6           | 184.1           | -                 |

| Lipid species                  | Isotope monitored <sup>a</sup> | Retention Time <sup>b</sup> | Q1 <sup>c</sup> | Q3 <sup>d</sup> | Correction Factor |
|--------------------------------|--------------------------------|-----------------------------|-----------------|-----------------|-------------------|
| LPC 13:0 (IS) <sup>e</sup>     | [M+H] <sup>+</sup>             | 0.8                         | 454.3           | 184.1           | -                 |
| LPC 13:0 +1 (IS) <sup>e</sup>  | [M+1+H] <sup>+</sup>           | 0.8                         | 455.3           | 185.1           | -                 |
| LPC 14:0                       | [M+H] <sup>+</sup>             | 0.9                         | 468.3           | 184.1           | -                 |
| LPC 15:0                       | [M+H] <sup>+</sup>             | 1.3                         | 482.3           | 184.1           | -                 |
| LPC 16:0                       | [M+1+H] <sup>+</sup>           | 1.8                         | 497.3           | 185.1           | -                 |
| LPC 16:1                       | [M+H] <sup>+</sup>             | 1.2                         | 494.3           | 184.1           | -                 |
| LPC 17:0                       | [M+H] <sup>+</sup>             | 2.5                         | 510.4           | 184.1           | -                 |
| LPC 17:1                       | [M+H] <sup>+</sup>             | 1.6                         | 508.3           | 184.1           | -                 |
| LPC 18:0                       | [M+H] <sup>+</sup>             | 3.3                         | 524.4           | 184.1           | -                 |
| LPC 18:1                       | [M+H] <sup>+</sup>             | 2.2                         | 522.4           | 184.1           | -                 |
| LPC 18:2                       | [M+H] <sup>+</sup>             | 1.4                         | 520.3           | 184.1           | -                 |
| LPC 18:3                       | [M+H] <sup>+</sup>             | 1.1                         | 518.3           | 184.1           | -                 |
| LPC 20:0                       | [M+H] <sup>+</sup>             | 4.2                         | 552.4           | 184.1           | -                 |
| LPC 20:1                       | [M+H] <sup>+</sup>             | 3.6                         | 550.4           | 184.1           | -                 |
| LPC 20:2                       | [M+H] <sup>+</sup>             | 2.8                         | 548.4           | 184.1           | -                 |
| LPC 20:3                       | [M+H] <sup>+</sup>             | 1.9                         | 546.4           | 184.1           | -                 |
| LPC 20:4                       | [M+H] <sup>+</sup>             | 1.5                         | 544.3           | 184.1           | -                 |
| LPC 20:5                       | [M+H] <sup>+</sup>             | 1.1                         | 542.3           | 184.1           | -                 |
| LPC 22:0                       | [M+H] <sup>+</sup>             | 4.9                         | 580.4           | 184.1           | -                 |
| LPC 22:1                       | [M+H] <sup>+</sup>             | 4.3                         | 578.4           | 184.1           | -                 |
| LPC 22:6                       | [M+H] <sup>+</sup>             | 1.6                         | 568.3           | 184.1           | -                 |
| LPC 24:0                       | [M+H] <sup>+</sup>             | 5.3                         | 608.5           | 184.1           | -                 |
| LPC 26:0                       | [M+H] <sup>+</sup>             | 5.8                         | 636.5           | 184.1           | -                 |
| LPC(O-20:0)                    | [M+H] <sup>+</sup>             | 4.4                         | 538.4           | 104.1           | -                 |
| LPC(O-22:0)                    | [M+H] <sup>+</sup>             | 5.0                         | 566.5           | 104.1           | -                 |
| LPC(O-22:1)                    | [M+H] <sup>+</sup>             | 4.5                         | 564.4           | 104.1           | -                 |
| LPC(O-24:0)                    | [M+H] <sup>+</sup>             | 5.5                         | 594.5           | 104.1           | -                 |
| LPC(O-24:1)                    | [M+H] <sup>+</sup>             | 5.0                         | 592.5           | 104.1           | -                 |
| LPC(O-24:2)                    | [M+H] <sup>+</sup>             | 4.7                         | 590.5           | 104.1           | -                 |
| PE 17:0/17:0 (IS) <sup>e</sup> | [M+H] <sup>+</sup>             | 6.7                         | 720.6           | 579.5           | -                 |
| PE 32:1                        | [M+H] <sup>+</sup>             | 6.2                         | 690.5           | 549.5           | -                 |
| PE 34:1                        | [M+H] <sup>+</sup>             | 6.5                         | 718.5           | 577.5           | -                 |
| PE 34:2                        | [M+H] <sup>+</sup>             | 6.3                         | 716.5           | 575.5           | -                 |
| PE 34:3                        | [M+H] <sup>+</sup>             | 6.1                         | 714.5           | 573.5           | -                 |
| PE 35:1                        | [M+H] <sup>+</sup>             | 6.6                         | 732.6           | 591.5           | -                 |
| PE 35:2                        | [M+H] <sup>+</sup>             | 6.4                         | 730.5           | 589.5           | -                 |
| PE 36:1                        | [M+H] <sup>+</sup>             | 6.8                         | 746.6           | 605.6           | -                 |
| PE 36:2                        | [M+H] <sup>+</sup>             | 6.6                         | 744.6           | 603.5           | -                 |
| PE 36:3                        | [M+H] <sup>+</sup>             | 6.4                         | 742.5           | 601.5           | -                 |
| PE 36:4                        | [M+H] <sup>+</sup>             | 6.3                         | 740.5           | 599.5           | -                 |
| PE 36:5                        | [M+H] <sup>+</sup>             | 6.1                         | 738.5           | 597.5           | -                 |
| PE 38:3                        | [M+H] <sup>+</sup>             | 6.6                         | 770.6           | 629.6           | -                 |
| PE 38:4                        | [M+H] <sup>+</sup>             | 6.6                         | 768.6           | 627.5           | -                 |
| PE 38:5                        | [M+H] <sup>+</sup>             | 6.4                         | 766.5           | 625.5           | -                 |
| PE 38:6                        | [M+H] <sup>+</sup>             | 6.3                         | 764.5           | 623.5           | -                 |

| Lipid species | Isotope monitored <sup>a</sup>    | Retention Time <sup>b</sup> | Q1 <sup>c</sup> | Q3 <sup>d</sup> | Correction Factor |
|---------------|-----------------------------------|-----------------------------|-----------------|-----------------|-------------------|
| PE 40:5       | [M+H] <sup>+</sup>                | 6.6                         | 794.6           | 653.6           | -                 |
| PE 40:6       | [M+H] <sup>+</sup>                | 6.6                         | 792.6           | 651.5           | -                 |
| PE 40:7       | [M+H] <sup>+</sup>                | 6.4                         | 790.5           | 649.5           | -                 |
| PE(O-34:1)    | [M+H] <sup>+</sup>                | 6.6                         | 704.6           | 563.5           | -                 |
| PE(O-34:2)    | [M+H] <sup>+</sup>                | 6.4                         | 702.5           | 561.5           | -                 |
| PE(O-36:2)    | [M+H] <sup>+</sup>                | 6.7                         | 730.5           | 589.5           | -                 |
| PE(O-36:3)    | [M+H] <sup>+</sup>                | 6.5                         | 728.6           | 587.5           | -                 |
| PE(O-36:4)    | [M+H] <sup>+</sup>                | 6.4                         | 726.5           | 585.5           | -                 |
| PE(O-36:5)    | [M+H] <sup>+</sup>                | 6.3                         | 724.5           | 583.5           | -                 |
| PE(O-38:4)    | [M+H] <sup>+</sup>                | 6.7                         | 754.6           | 613.6           | -                 |
| PE(O-38:5)    | [M+H] <sup>+</sup>                | 6.5                         | 752.6           | 611.5           | -                 |
| PE(O-38:6)    | [M+H] <sup>+</sup>                | 6.5                         | 750.5           | 609.5           | -                 |
| PE(O-40:5)    | [M+H] <sup>+</sup>                | 6.7                         | 780.6           | 639.6           | -                 |
| PE(O-40:6)    | [M+H] <sup>+</sup>                | 6.7                         | 778.5           | 637.5           | -                 |
| PE(O-40:7)    | [M+H] <sup>+</sup>                | 6.5                         | 776.6           | 635.5           | -                 |
| PE(P-34:1)    | [M+H] <sup>+</sup>                | 6.6                         | 702.5           | 561.5           | -                 |
| PE(P-34:2)    | [M+H] <sup>+</sup>                | 6.4                         | 700.5           | 559.5           | -                 |
| PE(P-36:1)    | [M+H] <sup>+</sup>                | 6.8                         | 730.5           | 589.5           | -                 |
| PE(P-36:2)    | [M+H] <sup>+</sup>                | 6.7                         | 728.6           | 587.5           | -                 |
| PE(P-36:4)    | [M+H] <sup>+</sup>                | 6.4                         | 724.5           | 583.5           | -                 |
| PE(P-38:4)    | [M+H] <sup>+</sup>                | 6.7                         | 752.6           | 611.5           | -                 |
| PE(P-38:6)    | [M+H] <sup>+</sup>                | 6.4                         | 748.5           | 607.5           | -                 |
| PE(P-40:5)    | [M+H] <sup>+</sup>                | 6.7                         | 778.5           | 637.5           | -                 |
| PE(P-40:6)    | [M+H] <sup>+</sup>                | 6.7                         | 776.6           | 635.5           | -                 |
| LPE 16:0      | [M+H] <sup>+</sup>                | 1.9                         | 454.3           | 313.3           | -                 |
| LPE 18:0      | [M+H] <sup>+</sup>                | 3.6                         | 482.3           | 341.3           | -                 |
| LPE 18:1      | [M+H] <sup>+</sup>                | 2.4                         | 480.3           | 339.3           | -                 |
| LPE 18:2      | [M+H] <sup>+</sup>                | 1.7                         | 478.3           | 337.3           | -                 |
| LPE 20:4      | [M+H] <sup>+</sup>                | 1.8                         | 502.3           | 361.3           | -                 |
| LPE 22:6      | [M+H] <sup>+</sup>                | 1.8                         | 526.3           | 385.3           | -                 |
| PI 32:0       | [M+NH <sub>4</sub> ] <sup>+</sup> | 5.3                         | 828.6           | 551.6           | -                 |
| PI 32:1       | [M+NH <sub>4</sub> ] <sup>+</sup> | 5.1                         | 826.5           | 549.5           | -                 |
| PI 34:0       | [M+NH <sub>4</sub> ] <sup>+</sup> | 5.7                         | 856.6           | 579.6           | -                 |
| PI 34:1       | [M+NH <sub>4</sub> ] <sup>+</sup> | 5.4                         | 854.6           | 577.6           | -                 |
| PI 36:0       | [M+NH <sub>4</sub> ] <sup>+</sup> | 6.0                         | 884.6           | 607.6           | -                 |
| PI 36:1       | [M+NH <sub>4</sub> ] <sup>+</sup> | 5.8                         | 882.6           | 605.6           | -                 |
| PI 36:2       | [M+NH <sub>4</sub> ] <sup>+</sup> | 5.6                         | 880.6           | 603.6           | -                 |
| PI 36:3       | [M+NH <sub>4</sub> ] <sup>+</sup> | 5.4                         | 878.6           | 601.6           | -                 |
| PI 36:4       | [M+NH <sub>4</sub> ] <sup>+</sup> | 5.3                         | 876.6           | 599.6           | -                 |
| PI 38:2       | [M+NH <sub>4</sub> ] <sup>+</sup> | 5.9                         | 908.6           | 631.6           | -                 |
| PI 38:3       | [M+NH <sub>4</sub> ] <sup>+</sup> | 5.7                         | 906.6           | 629.6           | -                 |
| PI 38:4       | [M+NH <sub>4</sub> ] <sup>+</sup> | 5.6                         | 904.6           | 627.6           | -                 |
| PI 38:5       | [M+NH <sub>4</sub> ] <sup>+</sup> | 5.4                         | 902.6           | 625.6           | -                 |
| PI 38:6       | [M+NH <sub>4</sub> ] <sup>+</sup> | 5.3                         | 900.6           | 623.6           | -                 |
| PI 40:4       | [M+NH <sub>4</sub> ] <sup>+</sup> | 5.8                         | 932.6           | 655.6           | -                 |

| Lipid species                   | Isotope monitored <sup>a</sup>      | Retention Time <sup>b</sup> | Q1 <sup>c</sup> | Q3 <sup>d</sup> | Correction Factor |
|---------------------------------|-------------------------------------|-----------------------------|-----------------|-----------------|-------------------|
| PI 40:5                         | [M+NH <sub>4</sub> ] <sup>+</sup>   | 5.7                         | 930.6           | 653.6           | -                 |
| PI 40:6                         | [M+NH <sub>4</sub> ] <sup>+</sup>   | 5.6                         | 928.6           | 651.6           | -                 |
| PS 17:0/17:0 (IS) <sup>e</sup>  | [M+H] <sup>+</sup>                  | 5.7                         | 764.5           | 579.5           | -                 |
| PS 36:1                         | [M+H] <sup>+</sup>                  | 5.8                         | 790.6           | 605.6           | -                 |
| PS 36:2                         | [M+H] <sup>+</sup>                  | 5.6                         | 788.5           | 603.5           | -                 |
| PS 38:3                         | [M+H] <sup>+</sup>                  | 5.7                         | 814.6           | 629.6           | -                 |
| PS 38:4                         | [M+H] <sup>+</sup>                  | 5.6                         | 812.5           | 627.5           | -                 |
| PS 38:5                         | [M+H] <sup>+</sup>                  | 5.4                         | 810.5           | 625.5           | -                 |
| PS 40:5                         | [M+H] <sup>+</sup>                  | 5.8                         | 838.6           | 653.6           | -                 |
| PS 40:6                         | [M+H] <sup>+</sup>                  | 5.6                         | 836.5           | 651.5           | -                 |
| PG 17:0/17:0 (IS) <sup>e</sup>  | [M+NH <sub>4</sub> ] <sup>+</sup>   | 5.9                         | 768.6           | 579.5           | -                 |
| PG 34:1                         | [M+NH <sub>4</sub> ] <sup>+</sup>   | 5.7                         | 766.6           | 577.5           | -                 |
| PG 34:2                         | [M+NH <sub>4</sub> ] <sup>+</sup>   | 5.5                         | 764.5           | 575.5           | -                 |
| PG 36:1                         | [M+NH <sub>4</sub> ] <sup>+</sup>   | 6.0                         | 794.6           | 605.6           | -                 |
| PG 36:2                         | [M+NH <sub>4</sub> ] <sup>+</sup>   | 5.8                         | 792.6           | 603.5           | -                 |
| CE 18:0 d6 (IS) <sup>e</sup>    | [M+NH <sub>4</sub> ] <sup>+</sup>   | 9.3                         | 676.7           | 375.3           | -                 |
| CE 18:0 d6 +1 (IS) <sup>e</sup> | [M+1+NH <sub>4</sub> ] <sup>+</sup> | 9.3                         | 677.7           | 376.3           | -                 |
| CE 18:0 d6 +2 (IS) <sup>e</sup> | [M+2+NH <sub>4</sub> ] <sup>+</sup> | 9.3                         | 678.7           | 377.3           | -                 |
| CE 14:0                         | [M+NH <sub>4</sub> ] <sup>+</sup>   | 9.1                         | 614.6           | 369.3           | 0.49              |
| CE 15:0                         | [M+NH <sub>4</sub> ] <sup>+</sup>   | 9.1                         | 628.6           | 369.3           | 0.49              |
| CE 16:0                         | [M+NH <sub>4</sub> ] <sup>+</sup>   | 9.2                         | 642.6           | 369.3           | 0.50              |
| CE 16:1                         | [M+NH <sub>4</sub> ] <sup>+</sup>   | 9.1                         | 640.6           | 369.3           | 0.80              |
| CE 16:2                         | [M+NH <sub>4</sub> ] <sup>+</sup>   | 8.9                         | 638.6           | 369.3           | 2.18              |
| CE 17:0                         | [M+NH <sub>4</sub> ] <sup>+</sup>   | 9.3                         | 656.6           | 369.3           | 0.98              |
| CE 17:1                         | [M+NH <sub>4</sub> ] <sup>+</sup>   | 9.2                         | 654.6           | 369.3           | 1.58              |
| CE 18:0                         | [M+NH <sub>4</sub> ] <sup>+</sup>   | 9.3                         | 670.7           | 369.3           | 1.42              |
| CE 18:1                         | [M+1+NH <sub>4</sub> ] <sup>+</sup> | 9.2                         | 669.6           | 370.3           | 2.31              |
| CE 18:2                         | [M+2+NH <sub>4</sub> ] <sup>+</sup> | 9.1                         | 668.6           | 371.3           | 6.27              |
| CE 18:3                         | [M+1+NH <sub>4</sub> ] <sup>+</sup> | 9.0                         | 665.6           | 370.3           | 6.27              |
| CE 20:1                         | [M+NH <sub>4</sub> ] <sup>+</sup>   | 9.3                         | 696.7           | 369.3           | 3.30              |
| CE 20:2                         | [M+NH <sub>4</sub> ] <sup>+</sup>   | 9.2                         | 694.7           | 369.3           | 8.97              |
| CE 20:3                         | [M+NH <sub>4</sub> ] <sup>+</sup>   | 9.1                         | 692.6           | 369.3           | 8.97              |
| CE 20:4                         | [M+2+NH <sub>4</sub> ] <sup>+</sup> | 9.0                         | 692.6           | 371.3           | 8.97              |
| CE 20:5                         | [M+2+NH <sub>4</sub> ] <sup>+</sup> | 8.9                         | 690.6           | 371.3           | 8.97              |
| CE 22:0                         | [M+NH <sub>4</sub> ] <sup>+</sup>   | 9.5                         | 726.7           | 369.3           | 2.75              |
| CE 22:1                         | [M+NH <sub>4</sub> ] <sup>+</sup>   | 9.4                         | 724.7           | 369.3           | 4.46              |
| CE 22:4                         | [M+NH <sub>4</sub> ] <sup>+</sup>   | 9.1                         | 718.7           | 369.3           | 12.12             |
| CE 22:5                         | [M+NH <sub>4</sub> ] <sup>+</sup>   | 9.0                         | 716.6           | 369.3           | 12.12             |
| CE 22:6                         | [M+NH <sub>4</sub> ] <sup>+</sup>   | 8.9                         | 716.6           | 371.3           | 12.12             |
| CE 24:0                         | [M+NH <sub>4</sub> ] <sup>+</sup>   | 9.6                         | 754.7           | 369.3           | 3.44              |
| CE 24:1                         | [M+NH <sub>4</sub> ] <sup>+</sup>   | 9.5                         | 752.7           | 369.3           | 5.58              |
| CE 24:4                         | [M+NH <sub>4</sub> ] <sup>+</sup>   | 9.2                         | 746.7           | 369.3           | 15.15             |
| CE 24:5                         | [M+NH <sub>4</sub> ] <sup>+</sup>   | 9.1                         | 744.7           | 369.3           | 15.15             |
| CE 24:6                         | [M+NH <sub>4</sub> ] <sup>+</sup>   | 9.0                         | 742.7           | 369.3           | 15.15             |
| COH d7 (IS) <sup>e</sup>        | [M+NH <sub>4</sub> ] <sup>+</sup>   | 6.5                         | 411.4           | 376.3           | -                 |

| Lipid species                          | Isotope monitored <sup>a</sup>      | Retention Time <sup>b</sup> | Q1 <sup>c</sup> | Q3 <sup>d</sup> | Correction Factor |
|----------------------------------------|-------------------------------------|-----------------------------|-----------------|-----------------|-------------------|
| COH                                    | [M+NH <sub>4</sub> ] <sup>+</sup>   | 6.5                         | 404.4           | 369.3           | -                 |
| DG 15:0/15:0 (IS) <sup>e</sup>         | [M+NH <sub>4</sub> ] <sup>+</sup>   | 1.9                         | 558.5           | 299.3           | 1.00              |
| DG 14:0/16:0                           | [M+NH <sub>4</sub> ] <sup>+</sup>   | 1.9                         | 558.5           | 313.3           | 0.50              |
| DG 14:0/18:1                           | [M+NH <sub>4</sub> ] <sup>+</sup>   | 1.9                         | 584.5           | 285.2           | 0.50              |
| DG 14:0/18:2                           | [M+NH <sub>4</sub> ] <sup>+</sup>   | 1.8                         | 582.5           | 285.2           | 0.50              |
| DG 16:0/16:0                           | [M+NH <sub>4</sub> ] <sup>+</sup>   | 2.0                         | 586.5           | 313.3           | 1.00              |
| DG 16:0/18:0                           | [M+NH <sub>4</sub> ] <sup>+</sup>   | 2.1                         | 614.6           | 341.3           | 0.50              |
| DG 16:0/18:1                           | [M+NH <sub>4</sub> ] <sup>+</sup>   | 2.0                         | 612.6           | 339.3           | 0.50              |
| DG 16:0/18:2                           | [M+NH <sub>4</sub> ] <sup>+</sup>   | 1.9                         | 610.5           | 313.3           | 0.50              |
| DG 16:0/20:3                           | [M+NH <sub>4</sub> ] <sup>+</sup>   | 2.0                         | 636.6           | 313.3           | 0.50              |
| DG 16:0/20:4                           | [M+NH <sub>4</sub> ] <sup>+</sup>   | 1.9                         | 634.5           | 313.3           | 0.50              |
| DG 16:0/22:5                           | [M+NH <sub>4</sub> ] <sup>+</sup>   | 1.9                         | 660.6           | 313.3           | 0.50              |
| DG 16:0/22:6                           | [M+NH <sub>4</sub> ] <sup>+</sup>   | 1.8                         | 658.5           | 313.3           | 0.50              |
| DG 16:1/18:0                           | [M+NH <sub>4</sub> ] <sup>+</sup>   | 2.0                         | 612.6           | 311.3           | 0.50              |
| DG 16:1/18:1                           | [M+NH <sub>4</sub> ] <sup>+</sup>   | 1.9                         | 610.5           | 339.3           | 0.50              |
| DG 18:0/18:1                           | [M+NH <sub>4</sub> ] <sup>+</sup>   | 2.1                         | 640.6           | 339.3           | 0.50              |
| DG 18:0/18:2                           | [M+NH <sub>4</sub> ] <sup>+</sup>   | 2.0                         | 638.6           | 341.3           | 0.50              |
| DG 18:0/20:4                           | [M+NH <sub>4</sub> ] <sup>+</sup>   | 2.0                         | 662.6           | 341.3           | 0.50              |
| DG 18:1/18:1                           | [M+NH <sub>4</sub> ] <sup>+</sup>   | 2.0                         | 638.6           | 339.3           | 1.00              |
| DG 18:1/18:2                           | [M+NH <sub>4</sub> ] <sup>+</sup>   | 1.9                         | 636.6           | 339.3           | 0.50              |
| DG 18:1/18:3                           | [M+NH <sub>4</sub> ] <sup>+</sup>   | 1.8                         | 634.5           | 339.3           | 0.50              |
| DG 18:1/20:3                           | [M+NH <sub>4</sub> ] <sup>+</sup>   | 1.9                         | 662.6           | 339.3           | 0.50              |
| DG 18:1/20:4                           | [M+NH <sub>4</sub> ] <sup>+</sup>   | 1.9                         | 660.6           | 339.3           | 0.50              |
| DG 18:2/18:2                           | [M+NH <sub>4</sub> ] <sup>+</sup>   | 1.8                         | 634.5           | 337.3           | 1.00              |
| TG 17:0/17:0/17:0 (IS) <sup>e</sup>    | [M+NH <sub>4</sub> ] <sup>+</sup>   | 4.5                         | 866.8           | 579.5           | 1.00              |
| TG 17:0/17:0/17:0 +1 (IS) <sup>e</sup> | [M+1+NH <sub>4</sub> ] <sup>+</sup> | 4.5                         | 867.8           | 580.5           | 1.00              |
| TG 14:0/16:0/18:1                      | [M+NH <sub>4</sub> ] <sup>+</sup>   | 3.6                         | 822.8           | 523.5           | 0.33              |
| TG 14:0/16:0/18:2                      | [M+NH <sub>4</sub> ] <sup>+</sup>   | 3.3                         | 820.8           | 547.5           | 0.33              |
| TG 14:0/16:1/18:1                      | [M+NH <sub>4</sub> ] <sup>+</sup>   | 3.3                         | 820.8           | 521.5           | 0.33              |
| TG 14:0/16:1/18:2                      | [M+NH <sub>4</sub> ] <sup>+</sup>   | 3.0                         | 818.8           | 521.5           | 0.33              |
| TG 14:0/17:0/18:1                      | [M+NH <sub>4</sub> ] <sup>+</sup>   | 3.7                         | 836.8           | 537.5           | 0.33              |
| TG 14:0/18:0/18:1                      | [M+NH <sub>4</sub> ] <sup>+</sup>   | 3.9                         | 850.8           | 605.6           | 0.33              |
| TG 14:0/18:2/18:2                      | [M+NH <sub>4</sub> ] <sup>+</sup>   | 3.0                         | 844.8           | 599.5           | 0.33              |
| TG 14:1/16:0/18:1                      | [M+NH <sub>4</sub> ] <sup>+</sup>   | 3.3                         | 820.8           | 577.6           | 0.33              |
| TG 14:1/16:1/18:0                      | [M+NH <sub>4</sub> ] <sup>+</sup>   | 3.3                         | 820.8           | 549.5           | 0.33              |
| TG 14:1/18:0/18:2                      | [M+NH <sub>4</sub> ] <sup>+</sup>   | 3.3                         | 846.8           | 603.6           | 0.33              |
| TG 14:1/18:1/18:1                      | [M+NH <sub>4</sub> ] <sup>+</sup>   | 3.3                         | 846.8           | 547.5           | 0.67              |
| TG 15:0/16:0/18:1                      | [M+NH <sub>4</sub> ] <sup>+</sup>   | 3.7                         | 836.8           | 577.5           | 0.33              |
| TG 15:0/18:1/18:1                      | [M+NH <sub>4</sub> ] <sup>+</sup>   | 3.7                         | 862.8           | 603.6           | 0.33              |
| TG 16:0/16:0/16:0                      | [M+NH <sub>4</sub> ] <sup>+</sup>   | 3.9                         | 824.8           | 551.5           | 1.00              |
| TG 16:0/16:0/18:0                      | [M+NH <sub>4</sub> ] <sup>+</sup>   | 4.3                         | 852.8           | 551.5           | 0.33              |
| TG 16:0/16:0/18:1                      | [M+1+NH <sub>4</sub> ] <sup>+</sup> | 3.9                         | 851.8           | 552.5           | 0.33              |
| TG 16:0/16:0/18:2                      | [M+NH <sub>4</sub> ] <sup>+</sup>   | 3.6                         | 848.8           | 551.5           | 0.33              |
| TG 16:0/16:1/17:0                      | [M+NH <sub>4</sub> ] <sup>+</sup>   | 3.7                         | 836.8           | 563.5           | 0.33              |
| TG 16:0/16:1/18:1                      | [M+1+NH <sub>4</sub> ] <sup>+</sup> | 3.6                         | 849.8           | 550.5           | 0.33              |



| Lipid species     | Isotope monitored <sup>a</sup>      | Retention Time <sup>b</sup> | Q1 <sup>c</sup> | Q3 <sup>d</sup> | Correction Factor |
|-------------------|-------------------------------------|-----------------------------|-----------------|-----------------|-------------------|
| TG 16:0/17:0/18:0 | [M+NH <sub>4</sub> ] <sup>+</sup>   | 4.5                         | 866.8           | 593.6           | 0.33              |
| TG 16:0/17:0/18:1 | [M+NH <sub>4</sub> ] <sup>+</sup>   | 4.0                         | 864.8           | 565.5           | 0.33              |
| TG 16:0/17:0/18:2 | [M+NH <sub>4</sub> ] <sup>+</sup>   | 3.7                         | 862.8           | 589.6           | 0.33              |
| TG 16:0/18:0/18:1 | [M+NH <sub>4</sub> ] <sup>+</sup>   | 4.3                         | 878.8           | 577.5           | 0.33              |
| TG 16:0/18:1/18:1 | [M+1+NH <sub>4</sub> ] <sup>+</sup> | 3.9                         | 877.8           | 604.6           | 0.33              |
| TG 16:0/18:1/18:2 | [M+1+NH <sub>4</sub> ] <sup>+</sup> | 3.6                         | 875.8           | 578.6           | 0.33              |
| TG 16:0/18:2/18:2 | [M+NH <sub>4</sub> ] <sup>+</sup>   | 3.3                         | 872.8           | 599.6           | 0.33              |
| TG 16:1/16:1/16:1 | [M+NH <sub>4</sub> ] <sup>+</sup>   | 3.0                         | 818.8           | 547.5           | 1.00              |
| TG 16:1/16:1/18:0 | [M+NH <sub>4</sub> ] <sup>+</sup>   | 3.6                         | 848.8           | 547.5           | 0.33              |
| TG 16:1/16:1/18:1 | [M+1+NH <sub>4</sub> ] <sup>+</sup> | 3.3                         | 847.8           | 576.6           | 0.67              |
| TG 16:1/17:0/18:1 | [M+NH <sub>4</sub> ] <sup>+</sup>   | 3.7                         | 862.8           | 563.5           | 0.33              |
| TG 16:1/18:1/18:1 | [M+NH <sub>4</sub> ] <sup>+</sup>   | 3.5                         | 874.8           | 603.6           | 0.33              |
| TG 16:1/18:1/18:2 | [M+NH <sub>4</sub> ] <sup>+</sup>   | 3.3                         | 872.8           | 573.6           | 0.33              |
| TG 17:0/18:1/18:1 | [M+NH <sub>4</sub> ] <sup>+</sup>   | 4.0                         | 890.8           | 603.6           | 0.33              |
| TG 18:0/18:0/18:1 | [M+NH <sub>4</sub> ] <sup>+</sup>   | 4.7                         | 906.9           | 607.6           | 0.33              |
| TG 18:0/18:1/18:1 | [M+NH <sub>4</sub> ] <sup>+</sup>   | 4.2                         | 904.9           | 603.6           | 0.33              |
| TG 18:0/18:2/18:2 | [M+NH <sub>4</sub> ] <sup>+</sup>   | 3.6                         | 900.8           | 599.5           | 0.33              |
| TG 18:1/18:1/18:1 | [M+1+NH <sub>4</sub> ] <sup>+</sup> | 3.8                         | 903.9           | 604.6           | 0.33              |
| TG 18:1/18:1/18:2 | [M+NH <sub>4</sub> ] <sup>+</sup>   | 3.5                         | 900.9           | 603.9           | 0.33              |
| TG 18:1/18:1/20:4 | [M+NH <sub>4</sub> ] <sup>+</sup>   | 3.4                         | 924.9           | 603.6           | 0.33              |
| TG 18:1/18:1/22:6 | [M+NH <sub>4</sub> ] <sup>+</sup>   | 3.4                         | 948.9           | 603.7           | 0.33              |
| TG 18:1/18:2/18:2 | [M+NH <sub>4</sub> ] <sup>+</sup>   | 3.3                         | 898.9           | 599.6           | 0.33              |
| TG 18:2/18:2/18:2 | [M+NH <sub>4</sub> ] <sup>+</sup>   | 3.0                         | 896.9           | 599.6           | 1.00              |
| TG 18:2/18:2/20:4 | [M+NH <sub>4</sub> ] <sup>+</sup>   | 3.0                         | 920.9           | 599.6           | 0.33              |

<sup>a</sup> [M+1+H]<sup>+</sup> = naturally occurring isotopologue of 1 mass unit increase, [M+2+H]<sup>+</sup> = naturally occurring isotopologue of 2 mass unit increase, [M+1+NH<sub>4</sub>]<sup>+</sup> = naturally occurring ammonium adduct isotopologue of 1 mass unit increase.

<sup>b</sup> Units = minutes

<sup>c</sup> mass to charge value set for first quadrupole

<sup>d</sup> mass to charge value set for third quadrupole

<sup>e</sup> Denotes internal standard

<sup>f</sup> The designation of "a" and "b" refers to isomers that were chromatographically separated

Supplementary Table 2: Logistic regression of individual lipid species with sex and smoking status.

| Lipid      | Sex                                  |                      |                           | Smoking status                       |                      |                           |
|------------|--------------------------------------|----------------------|---------------------------|--------------------------------------|----------------------|---------------------------|
|            | IQR Odds Ratio (95% CI) <sup>a</sup> | p-value <sup>b</sup> | % Difference <sup>c</sup> | IQR Odds Ratio (95% CI) <sup>d</sup> | p-value <sup>b</sup> | % Difference <sup>e</sup> |
| dhCer 16:0 | 0.79 (0.67-0.93)                     | <b>8.65E-03</b>      | -10.5                     | 0.91 (0.76-1.07)                     | 4.04E-01             | -6.3                      |
| dhCer 18:0 | 0.67 (0.56-0.81)                     | <b>8.99E-05</b>      | -17.9                     | 0.96 (0.79-1.16)                     | 7.78E-01             | -7.0                      |
| dhCer 20:0 | 0.79 (0.65-0.95)                     | <b>1.80E-02</b>      | -10.8                     | 0.97 (0.79-1.19)                     | 8.62E-01             | -4.4                      |
| dhCer 22:0 | 0.90 (0.75-1.07)                     | 2.64E-01             | -9.3                      | 0.90 (0.74-1.10)                     | 4.75E-01             | -6.0                      |
| dhCer 24:0 | 1.00 (0.85-1.19)                     | 9.76E-01             | -5.2                      | 0.94 (0.77-1.13)                     | 6.53E-01             | -4.0                      |
| dhCer 24:1 | 0.95 (0.80-1.11)                     | 5.49E-01             | -6.6                      | 1.11 (0.93-1.32)                     | 3.90E-01             | 1.5                       |
| Cer 16:0   | 1.14 (0.94-1.39)                     | 2.11E-01             | 0.5                       | 1.02 (0.83-1.27)                     | 9.00E-01             | 0.0                       |
| Cer 18:0   | 0.87 (0.72-1.05)                     | 1.74E-01             | -7.3                      | 1.05 (0.86-1.29)                     | 7.34E-01             | -1.5                      |
| Cer 20:0   | 0.98 (0.82-1.17)                     | 8.15E-01             | -2.7                      | 1.02 (0.84-1.25)                     | 9.00E-01             | -0.7                      |
| Cer 22:0   | 1.32 (1.11-1.57)                     | <b>2.88E-03</b>      | 3.3                       | 0.91 (0.75-1.10)                     | 4.88E-01             | -1.9                      |
| Cer 24:0   | 1.80 (1.50-2.16)                     | <b>6.63E-09</b>      | 10.3                      | 0.88 (0.73-1.07)                     | 3.55E-01             | -0.4                      |
| Cer 24:1   | 1.47 (1.22-1.77)                     | <b>1.46E-04</b>      | 7.7                       | 1.23 (1.00-1.50)                     | 1.25E-01             | 5.4                       |
| MHC 16:0   | 0.82 (0.69-0.98)                     | <b>4.70E-02</b>      | -3.1                      | 1.07 (0.88-1.30)                     | 6.52E-01             | 0.3                       |
| MHC 18:0   | 0.55 (0.46-0.66)                     | <b>2.03E-09</b>      | -11.4                     | 1.15 (0.95-1.38)                     | 2.80E-01             | -0.8                      |
| MHC 20:0   | 0.80 (0.67-0.95)                     | <b>1.43E-02</b>      | -4.2                      | 1.11 (0.92-1.33)                     | 4.31E-01             | 0.8                       |
| MHC 22:0   | 1.00 (0.85-1.19)                     | 9.64E-01             | 0.4                       | 0.87 (0.72-1.05)                     | 2.75E-01             | -3.3                      |
| MHC 24:0   | 1.39 (1.16-1.65)                     | <b>5.84E-04</b>      | 9.4                       | 1.01 (0.83-1.23)                     | 9.50E-01             | 2.2                       |
| MHC 24:1   | 0.88 (0.74-1.05)                     | 2.00E-01             | 0.7                       | 1.22 (1.01-1.48)                     | 1.05E-01             | 4.9                       |
| DHC 16:0   | 0.72 (0.60-0.87)                     | <b>1.15E-03</b>      | -3.6                      | 0.99 (0.81-1.22)                     | 9.57E-01             | -1.1                      |
| DHC 18:0   | 0.82 (0.69-0.97)                     | <b>3.31E-02</b>      | -5.1                      | 1.03 (0.86-1.24)                     | 8.39E-01             | -1.1                      |
| DHC 20:0   | 0.74 (0.62-0.89)                     | <b>2.07E-03</b>      | -8.8                      | 0.98 (0.81-1.18)                     | 8.83E-01             | -3.4                      |
| DHC 22:0   | 0.79 (0.67-0.93)                     | <b>7.39E-03</b>      | -6.4                      | 0.89 (0.74-1.07)                     | 3.55E-01             | -4.7                      |
| DHC 24:0   | 1.24 (1.05-1.47)                     | <b>1.72E-02</b>      | 5.6                       | 1.01 (0.84-1.22)                     | 9.50E-01             | 1.4                       |
| DHC 24:1   | 1.14 (0.96-1.35)                     | 1.74E-01             | 6.0                       | 1.13 (0.94-1.37)                     | 3.38E-01             | 4.0                       |
| THC 16:0   | 0.60 (0.50-0.72)                     | <b>2.88E-07</b>      | -6.1                      | 1.10 (0.91-1.32)                     | 4.95E-01             | -0.3                      |
| THC 18:0   | 0.70 (0.59-0.84)                     | <b>1.83E-04</b>      | -5.9                      | 0.95 (0.79-1.14)                     | 7.22E-01             | -3.1                      |
| THC 20:0   | 0.55 (0.46-0.66)                     | <b>4.66E-09</b>      | -12.3                     | 1.13 (0.94-1.37)                     | 3.48E-01             | -0.7                      |
| THC 22:0   | 0.52 (0.43-0.64)                     | <b>1.99E-09</b>      | -10.9                     | 0.95 (0.77-1.16)                     | 7.38E-01             | -4.3                      |
| THC 24:0   | 0.86 (0.72-1.03)                     | 1.23E-01             | 0.5                       | 1.21 (1.00-1.47)                     | 1.27E-01             | 3.9                       |
| THC 24:1   | 0.63 (0.52-0.76)                     | <b>1.12E-05</b>      | -3.6                      | 1.56 (1.28-1.89)                     | <b>2.48E-04</b>      | 8.1                       |

| Lipid    | Sex                                  |                      |                           | Smoking status                       |                      |                           |
|----------|--------------------------------------|----------------------|---------------------------|--------------------------------------|----------------------|---------------------------|
|          | IQR Odds Ratio (95% CI) <sup>a</sup> | p-value <sup>b</sup> | % Difference <sup>c</sup> | IQR Odds Ratio (95% CI) <sup>d</sup> | p-value <sup>b</sup> | % Difference <sup>e</sup> |
| GM3 16:0 | 0.82 (0.68-0.98)                     | <b>4.45E-02</b>      | -1.5                      | 1.09 (0.90-1.32)                     | 5.43E-01             | 0.7                       |
| GM3 18:0 | 2.57 (2.09-3.14)                     | <b>1.61E-17</b>      | 21.4                      | 1.00 (0.82-1.23)                     | 9.67E-01             | 5.0                       |
| GM3 20:0 | 0.99 (0.82-1.18)                     | 8.96E-01             | 0.3                       | 1.10 (0.90-1.33)                     | 4.95E-01             | 1.2                       |
| GM3 22:0 | 1.43 (1.18-1.73)                     | <b>4.68E-04</b>      | 6.0                       | 0.90 (0.73-1.11)                     | 4.89E-01             | -1.2                      |
| GM3 24:0 | 2.12 (1.75-2.58)                     | <b>1.52E-12</b>      | 20.8                      | 1.04 (0.85-1.27)                     | 8.21E-01             | 5.5                       |
| GM3 24:1 | 1.54 (1.28-1.85)                     | <b>1.30E-05</b>      | 14.2                      | 1.34 (1.11-1.62)                     | <b>1.46E-02</b>      | 9.8                       |
| SM 31:1  | 0.47 (0.38-0.58)                     | <b>1.19E-11</b>      | -15.6                     | 0.62 (0.50-0.78)                     | <b>7.62E-04</b>      | -12.0                     |
| SM 32:1  | 0.68 (0.57-0.82)                     | <b>1.20E-04</b>      | -9.0                      | 0.87 (0.71-1.07)                     | 3.26E-01             | -4.9                      |
| SM 32:2  | 0.10 (0.07-0.14)                     | <b>8.05E-36</b>      | -30.2                     | 0.74 (0.57-0.96)                     | 7.32E-02             | -11.9                     |
| SM 33:1  | 0.68 (0.57-0.81)                     | <b>7.26E-05</b>      | -8.1                      | 0.71 (0.58-0.87)                     | <b>8.07E-03</b>      | -7.4                      |
| SM 34:1  | 0.72 (0.60-0.87)                     | <b>1.71E-03</b>      | -3.1                      | 1.01 (0.82-1.24)                     | 9.57E-01             | -0.7                      |
| SM 34:2  | 0.28 (0.22-0.36)                     | <b>1.24E-21</b>      | -15.3                     | 0.85 (0.67-1.07)                     | 3.06E-01             | -5.7                      |
| SM 34:3  | 0.27 (0.21-0.34)                     | <b>2.52E-23</b>      | -23.8                     | 0.54 (0.42-0.69)                     | <b>4.94E-05</b>      | -15.7                     |
| SM 35:1  | 0.74 (0.62-0.88)                     | <b>1.54E-03</b>      | -6.3                      | 0.71 (0.58-0.87)                     | <b>8.29E-03</b>      | -6.7                      |
| SM 35:2  | 0.43 (0.35-0.53)                     | <b>1.92E-14</b>      | -16.2                     | 0.56 (0.45-0.70)                     | <b>2.22E-05</b>      | -13.1                     |
| SM 36:1  | 0.56 (0.46-0.68)                     | <b>7.71E-08</b>      | -10.1                     | 0.89 (0.73-1.10)                     | 4.47E-01             | -4.4                      |
| SM 36:2  | 0.30 (0.24-0.38)                     | <b>1.03E-20</b>      | -18.7                     | 0.69 (0.55-0.87)                     | <b>1.11E-02</b>      | -9.9                      |
| SM 36:3  | 0.26 (0.20-0.34)                     | <b>4.45E-23</b>      | -24.8                     | 0.52 (0.41-0.67)                     | <b>2.17E-05</b>      | -16.9                     |
| SM 37:2  | 0.33 (0.26-0.41)                     | <b>2.18E-19</b>      | -21.3                     | 0.59 (0.46-0.74)                     | <b>2.27E-04</b>      | -14.4                     |
| SM 38:1  | 0.74 (0.61-0.89)                     | <b>2.14E-03</b>      | -6.2                      | 0.86 (0.70-1.05)                     | 2.75E-01             | -4.2                      |
| SM 38:2  | 0.35 (0.28-0.43)                     | <b>1.02E-18</b>      | -15.1                     | 0.87 (0.70-1.09)                     | 3.72E-01             | -5.5                      |
| SM 39:1  | 0.70 (0.57-0.85)                     | <b>6.48E-04</b>      | -10.1                     | 0.60 (0.48-0.76)                     | <b>2.89E-04</b>      | -12.5                     |
| SM 41:1  | 0.78 (0.65-0.93)                     | <b>9.66E-03</b>      | -7.2                      | 0.62 (0.51-0.77)                     | <b>2.72E-04</b>      | -9.6                      |
| SM 41:2  | 0.48 (0.40-0.58)                     | <b>1.60E-12</b>      | -12.4                     | 0.67 (0.54-0.81)                     | <b>1.26E-03</b>      | -9.3                      |
| SM 42:1  | 1.39 (1.16-1.66)                     | <b>6.17E-04</b>      | 5.3                       | 0.90 (0.74-1.09)                     | 4.31E-01             | -0.6                      |
| PC 28:0  | 0.99 (0.91-1.09)                     | 9.06E-01             | -0.7                      | 1.04 (0.95-1.15)                     | 5.72E-01             | 5.5                       |
| PC 29:0  | 0.53 (0.43-0.64)                     | <b>1.14E-09</b>      | -15.0                     | 0.63 (0.51-0.79)                     | <b>7.62E-04</b>      | -12.6                     |
| PC 30:0  | 0.88 (0.74-1.06)                     | 2.31E-01             | -4.8                      | 1.23 (1.01-1.50)                     | 1.05E-01             | 4.2                       |
| PC 31:0  | 0.93 (0.79-1.10)                     | 4.61E-01             | -4.4                      | 0.77 (0.63-0.94)                     | <b>3.92E-02</b>      | -8.3                      |
| PC 32:0  | 1.10 (0.92-1.31)                     | 3.62E-01             | 1.5                       | 1.37 (1.13-1.66)                     | <b>1.05E-02</b>      | 4.2                       |
| PC 33:0  | 0.93 (0.79-1.11)                     | 4.82E-01             | -1.1                      | 0.83 (0.68-1.01)                     | 1.45E-01             | -3.0                      |
| PC 33:1  | 0.92 (0.77-1.10)                     | 4.27E-01             | -1.6                      | 1.07 (0.87-1.30)                     | 6.76E-01             | 0.4                       |

| Lipid                 | Sex                                  |                      |                           | Smoking status                       |                      |                           |
|-----------------------|--------------------------------------|----------------------|---------------------------|--------------------------------------|----------------------|---------------------------|
|                       | IQR Odds Ratio (95% CI) <sup>a</sup> | p-value <sup>b</sup> | % Difference <sup>c</sup> | IQR Odds Ratio (95% CI) <sup>d</sup> | p-value <sup>b</sup> | % Difference <sup>e</sup> |
| PC 33:2               | 0.57 (0.47-0.68)                     | <b>2.52E-08</b>      | -12.0                     | 0.54 (0.44-0.67)                     | <b>1.28E-05</b>      | -13.3                     |
| PC 33:3               | 0.57 (0.47-0.69)                     | <b>3.00E-08</b>      | -16.5                     | 0.70 (0.56-0.86)                     | <b>6.99E-03</b>      | -13.9                     |
| PC 34:0               | 1.31 (1.09-1.56)                     | <b>6.35E-03</b>      | 3.6                       | 0.94 (0.77-1.15)                     | 6.88E-01             | -0.1                      |
| PC 34:1               | 1.13 (0.93-1.37)                     | 2.60E-01             | 2.1                       | 1.64 (1.33-2.02)                     | <b>1.37E-04</b>      | 5.7                       |
| PC 34:2               | 0.83 (0.70-0.99)                     | 6.02E-02             | -1.9                      | 1.16 (0.95-1.41)                     | 2.75E-01             | 0.5                       |
| PC 34:3               | 0.53 (0.43-0.64)                     | <b>3.02E-09</b>      | -10.7                     | 0.97 (0.78-1.19)                     | 8.37E-01             | -4.1                      |
| PC 34:4               | 0.70 (0.59-0.84)                     | <b>2.78E-04</b>      | -11.4                     | 0.99 (0.82-1.21)                     | 9.62E-01             | -4.3                      |
| PC 34:5               | 0.98 (0.84-1.14)                     | 8.24E-01             | -4.3                      | 1.01 (0.85-1.20)                     | 9.51E-01             | -1.4                      |
| PC 35:0               | 1.00 (0.84-1.20)                     | 9.87E-01             | -0.3                      | 0.83 (0.68-1.01)                     | 1.61E-01             | -5.9                      |
| PC 35:2               | 0.86 (0.71-1.02)                     | 1.18E-01             | -2.7                      | 0.66 (0.53-0.81)                     | <b>1.36E-03</b>      | -7.2                      |
| PC 35:3               | 0.69 (0.58-0.82)                     | <b>9.03E-05</b>      | -7.4                      | 0.71 (0.58-0.87)                     | <b>8.37E-03</b>      | -7.8                      |
| PC 35:4               | 0.78 (0.65-0.92)                     | <b>7.39E-03</b>      | -10.3                     | 0.64 (0.52-0.80)                     | <b>1.01E-03</b>      | -13.7                     |
| PC 35:5               | 0.99 (0.86-1.14)                     | 9.06E-01             | -6.2                      | 0.81 (0.67-0.98)                     | 8.50E-02             | -12.2                     |
| PC 36:2               | 0.92 (0.77-1.10)                     | 4.14E-01             | -0.7                      | 1.13 (0.93-1.37)                     | 3.60E-01             | 0.9                       |
| PC 36:3               | 0.77 (0.64-0.91)                     | <b>5.07E-03</b>      | -3.0                      | 0.96 (0.80-1.17)                     | 8.21E-01             | -1.3                      |
| PC 36:4a <sup>f</sup> | 0.93 (0.78-1.10)                     | 4.42E-01             | -0.3                      | 0.87 (0.71-1.06)                     | 3.06E-01             | -3.6                      |
| PC 36:4b <sup>f</sup> | 1.09 (0.92-1.30)                     | 3.75E-01             | 0.3                       | 1.17 (0.97-1.42)                     | 2.27E-01             | 2.5                       |
| PC 36:5               | 1.18 (1.00-1.39)                     | 6.50E-02             | 3.2                       | 1.03 (0.86-1.23)                     | 8.25E-01             | 1.7                       |
| PC 36:6               | 0.76 (0.64-0.90)                     | <b>2.93E-03</b>      | -11.5                     | 0.86 (0.71-1.04)                     | 2.62E-01             | -8.5                      |
| PC 37:4               | 1.09 (0.92-1.29)                     | 3.66E-01             | 0.4                       | 0.69 (0.56-0.83)                     | <b>1.88E-03</b>      | -7.2                      |
| PC 37:5               | 1.05 (0.89-1.24)                     | 5.92E-01             | -0.5                      | 0.82 (0.68-0.99)                     | 1.19E-01             | -6.2                      |
| PC 37:6               | 0.67 (0.57-0.80)                     | <b>2.07E-05</b>      | -13.5                     | 0.63 (0.51-0.77)                     | <b>2.72E-04</b>      | -15.9                     |
| PC 38:2               | 0.69 (0.58-0.83)                     | <b>1.77E-04</b>      | -6.5                      | 0.86 (0.71-1.05)                     | 2.75E-01             | -4.1                      |
| PC 38:3               | 1.06 (0.87-1.28)                     | 6.11E-01             | -1.3                      | 1.02 (0.83-1.26)                     | 9.21E-01             | 0.0                       |
| PC 38:4               | 1.15 (0.97-1.37)                     | 1.31E-01             | 1.7                       | 1.05 (0.87-1.27)                     | 7.10E-01             | 1.4                       |
| PC 38:5               | 0.98 (0.82-1.17)                     | 8.73E-01             | -0.9                      | 0.87 (0.71-1.06)                     | 2.89E-01             | -2.3                      |
| PC 38:6a <sup>f</sup> | 1.06 (0.88-1.26)                     | 5.94E-01             | 0.7                       | 0.83 (0.68-1.02)                     | 1.78E-01             | -3.9                      |
| PC 38:6b <sup>f</sup> | 0.90 (0.77-1.07)                     | 2.79E-01             | -2.8                      | 0.88 (0.73-1.06)                     | 3.12E-01             | -3.3                      |
| PC 38:7               | 0.70 (0.59-0.84)                     | <b>1.94E-04</b>      | -9.3                      | 0.72 (0.59-0.88)                     | <b>1.11E-02</b>      | -9.6                      |
| PC 39:6               | 0.93 (0.79-1.11)                     | 4.82E-01             | -2.4                      | 0.67 (0.54-0.82)                     | <b>1.85E-03</b>      | -9.8                      |
| PC 40:5               | 1.23 (1.02-1.47)                     | <b>3.93E-02</b>      | 3.0                       | 1.02 (0.83-1.24)                     | 9.24E-01             | 0.9                       |
| PC 40:6               | 0.94 (0.79-1.12)                     | 5.49E-01             | -3.1                      | 0.88 (0.73-1.07)                     | 3.55E-01             | -3.5                      |

| Lipid      | Sex                                  |                      |                           | Smoking status                       |                      |                           |
|------------|--------------------------------------|----------------------|---------------------------|--------------------------------------|----------------------|---------------------------|
|            | IQR Odds Ratio (95% CI) <sup>a</sup> | p-value <sup>b</sup> | % Difference <sup>c</sup> | IQR Odds Ratio (95% CI) <sup>d</sup> | p-value <sup>b</sup> | % Difference <sup>e</sup> |
| PC 40:7    | 0.68 (0.57-0.83)                     | <b>1.82E-04</b>      | -7.9                      | 0.62 (0.50-0.78)                     | <b>7.62E-04</b>      | -10.3                     |
| PC(O-30:0) | 0.79 (0.67-0.94)                     | <b>1.15E-02</b>      | -4.6                      | 0.82 (0.68-0.99)                     | 1.11E-01             | -5.4                      |
| PC(O-32:0) | 0.80 (0.67-0.95)                     | <b>1.76E-02</b>      | -2.5                      | 0.86 (0.70-1.05)                     | 2.67E-01             | -2.6                      |
| PC(O-32:1) | 0.59 (0.49-0.71)                     | <b>2.11E-07</b>      | -8.1                      | 1.17 (0.95-1.43)                     | 2.74E-01             | 1.3                       |
| PC(O-32:2) | 1.08 (0.94-1.23)                     | 3.25E-01             | 4.9                       | 1.02 (0.88-1.18)                     | 9.00E-01             | 2.0                       |
| PC(O-34:0) | 0.81 (0.68-0.97)                     | <b>3.64E-02</b>      | -3.6                      | 0.75 (0.61-0.92)                     | <b>3.06E-02</b>      | -5.2                      |
| PC(O-34:1) | 0.65 (0.54-0.78)                     | <b>1.11E-05</b>      | -4.0                      | 1.01 (0.83-1.23)                     | 9.48E-01             | -0.8                      |
| PC(O-34:2) | 0.85 (0.72-1.00)                     | 7.46E-02             | -2.4                      | 0.84 (0.70-1.01)                     | 1.66E-01             | -3.9                      |
| PC(O-34:4) | 1.23 (1.05-1.44)                     | <b>1.62E-02</b>      | 6.5                       | 0.81 (0.67-0.97)                     | 7.89E-02             | -4.7                      |
| PC(O-35:4) | 1.49 (1.28-1.74)                     | <b>2.58E-06</b>      | 16.3                      | 0.92 (0.78-1.09)                     | 4.95E-01             | 0.6                       |
| PC(O-36:0) | 0.87 (0.75-1.01)                     | 8.67E-02             | -4.8                      | 0.90 (0.76-1.07)                     | 4.03E-01             | -3.9                      |
| PC(O-36:1) | 0.88 (0.75-1.04)                     | 1.70E-01             | -1.6                      | 0.93 (0.78-1.12)                     | 6.29E-01             | -1.9                      |
| PC(O-36:2) | 0.70 (0.58-0.83)                     | <b>1.95E-04</b>      | -5.6                      | 0.75 (0.61-0.92)                     | <b>2.83E-02</b>      | -6.5                      |
| PC(O-36:3) | 0.86 (0.72-1.03)                     | 1.23E-01             | -2.8                      | 0.70 (0.57-0.86)                     | <b>7.18E-03</b>      | -5.7                      |
| PC(O-36:4) | 1.40 (1.17-1.67)                     | <b>4.04E-04</b>      | 5.2                       | 0.86 (0.71-1.05)                     | 2.80E-01             | -1.1                      |
| PC(O-36:5) | 1.73 (1.44-2.06)                     | <b>2.81E-08</b>      | 11.3                      | 0.86 (0.70-1.05)                     | 2.67E-01             | -0.5                      |
| PC(O-38:4) | 1.38 (1.16-1.63)                     | <b>4.66E-04</b>      | 4.7                       | 0.82 (0.68-1.00)                     | 1.24E-01             | -2.1                      |
| PC(O-38:5) | 1.25 (1.05-1.49)                     | <b>1.95E-02</b>      | 3.0                       | 0.74 (0.60-0.90)                     | <b>1.83E-02</b>      | -3.6                      |
| PC(O-40:7) | 0.69 (0.58-0.83)                     | <b>1.12E-04</b>      | -8.3                      | 0.63 (0.51-0.77)                     | <b>2.34E-04</b>      | -10.0                     |
| PC(P-32:0) | 1.07 (0.91-1.27)                     | 4.59E-01             | 2.1                       | 1.06 (0.88-1.27)                     | 6.81E-01             | 1.9                       |
| PC(P-32:1) | 0.76 (0.64-0.89)                     | <b>1.90E-03</b>      | -3.3                      | 1.36 (1.14-1.62)                     | <b>7.75E-03</b>      | 7.1                       |
| PC(P-34:1) | 0.77 (0.65-0.92)                     | <b>7.43E-03</b>      | -1.6                      | 1.12 (0.92-1.35)                     | 4.16E-01             | 1.9                       |
| PC(P-34:2) | 1.17 (0.98-1.40)                     | 1.08E-01             | 4.3                       | 0.75 (0.60-0.92)                     | <b>3.06E-02</b>      | -3.5                      |
| PC(P-36:2) | 0.99 (0.82-1.19)                     | 9.33E-01             | 1.4                       | 0.74 (0.59-0.92)                     | <b>2.83E-02</b>      | -6.0                      |
| PC(P-36:5) | 1.45 (1.26-1.67)                     | <b>9.94E-07</b>      | 17.8                      | 0.85 (0.73-0.99)                     | 1.19E-01             | -3.5                      |
| PC(P-38:5) | 1.07 (0.90-1.27)                     | 4.77E-01             | -0.1                      | 0.74 (0.60-0.90)                     | <b>1.51E-02</b>      | -4.8                      |
| PC(P-40:5) | 0.85 (0.72-1.01)                     | 9.52E-02             | -4.0                      | 0.71 (0.58-0.87)                     | <b>7.75E-03</b>      | -7.3                      |
| LPC 14:0   | 1.23 (1.04-1.45)                     | <b>2.21E-02</b>      | 6.3                       | 1.04 (0.88-1.24)                     | 7.78E-01             | 2.3                       |
| LPC 15:0   | 1.32 (1.11-1.56)                     | <b>2.55E-03</b>      | 5.7                       | 0.56 (0.45-0.69)                     | <b>1.28E-05</b>      | -9.8                      |
| LPC 16:0   | 1.29 (1.10-1.50)                     | <b>3.07E-03</b>      | 9.7                       | 1.10 (0.92-1.31)                     | 4.43E-01             | 4.9                       |
| LPC 16:1   | 1.33 (1.14-1.54)                     | <b>5.57E-04</b>      | 10.4                      | 1.21 (1.05-1.40)                     | <b>4.22E-02</b>      | 8.4                       |
| LPC 17:0   | 1.33 (1.11-1.59)                     | <b>2.92E-03</b>      | 10.8                      | 0.77 (0.63-0.95)                     | 5.36E-02             | -4.1                      |

| Lipid       | Sex                                  |                      |                           | Smoking status                       |                      |                           |
|-------------|--------------------------------------|----------------------|---------------------------|--------------------------------------|----------------------|---------------------------|
|             | IQR Odds Ratio (95% CI) <sup>a</sup> | p-value <sup>b</sup> | % Difference <sup>c</sup> | IQR Odds Ratio (95% CI) <sup>d</sup> | p-value <sup>b</sup> | % Difference <sup>e</sup> |
| LPC 17:1    | 1.81 (1.51-2.18)                     | <b>3.50E-09</b>      | 16.5                      | 1.09 (0.90-1.31)                     | 5.29E-01             | 5.7                       |
| LPC 18:0    | 1.69 (1.40-2.04)                     | <b>3.01E-07</b>      | 11.1                      | 0.89 (0.72-1.10)                     | 4.31E-01             | 1.0                       |
| LPC 18:1    | 1.63 (1.34-1.99)                     | <b>4.94E-06</b>      | 17.4                      | 1.17 (0.96-1.44)                     | 2.62E-01             | 8.4                       |
| LPC 18:2    | 2.76 (2.24-3.40)                     | <b>5.08E-19</b>      | 25.4                      | 0.94 (0.77-1.15)                     | 6.88E-01             | 4.7                       |
| LPC 18:3    | 1.82 (1.54-2.15)                     | <b>6.94E-11</b>      | 29.7                      | 1.13 (0.96-1.33)                     | 2.67E-01             | 12.0                      |
| LPC 20:0    | 1.70 (1.42-2.02)                     | <b>3.79E-08</b>      | 16.8                      | 0.87 (0.71-1.05)                     | 2.80E-01             | 1.4                       |
| LPC 20:1    | 1.52 (1.28-1.80)                     | <b>6.27E-06</b>      | 13.8                      | 0.97 (0.80-1.16)                     | 8.21E-01             | 3.3                       |
| LPC 20:2    | 1.29 (1.10-1.51)                     | <b>2.81E-03</b>      | 13.7                      | 0.98 (0.83-1.16)                     | 8.92E-01             | 3.1                       |
| LPC 20:3    | 2.34 (1.94-2.83)                     | <b>8.28E-17</b>      | 21.2                      | 1.05 (0.87-1.26)                     | 7.34E-01             | 6.0                       |
| LPC 20:4    | 2.66 (2.18-3.25)                     | <b>2.58E-19</b>      | 23.2                      | 0.98 (0.80-1.20)                     | 9.00E-01             | 5.0                       |
| LPC 20:5    | 2.01 (1.68-2.41)                     | <b>1.60E-12</b>      | 36.0                      | 0.99 (0.84-1.16)                     | 9.46E-01             | 8.2                       |
| LPC 22:0    | 1.66 (1.40-1.98)                     | <b>1.38E-07</b>      | 14.6                      | 0.87 (0.72-1.05)                     | 2.86E-01             | 0.8                       |
| LPC 22:1    | 1.57 (1.34-1.84)                     | <b>1.96E-07</b>      | 24.1                      | 1.01 (0.89-1.16)                     | 9.03E-01             | 6.8                       |
| LPC 22:6    | 1.49 (1.26-1.75)                     | <b>8.81E-06</b>      | 15.6                      | 0.92 (0.76-1.10)                     | 4.95E-01             | 0.4                       |
| LPC 24:0    | 1.58 (1.32-1.90)                     | <b>4.82E-06</b>      | 11.9                      | 1.07 (0.88-1.30)                     | 6.58E-01             | 4.7                       |
| LPC 26:0    | 0.94 (0.80-1.12)                     | 5.52E-01             | 2.3                       | 1.23 (1.02-1.48)                     | 8.62E-02             | 5.9                       |
| LPC(O-20:0) | 1.65 (1.36-2.01)                     | <b>2.33E-06</b>      | 13.4                      | 0.85 (0.68-1.06)                     | 2.75E-01             | 0.7                       |
| LPC(O-22:0) | 1.65 (1.37-1.98)                     | <b>8.38E-07</b>      | 11.6                      | 0.96 (0.79-1.17)                     | 8.09E-01             | 2.5                       |
| LPC(O-22:1) | 1.24 (1.03-1.49)                     | <b>2.98E-02</b>      | 11.4                      | 1.07 (0.87-1.31)                     | 6.58E-01             | 4.9                       |
| LPC(O-24:0) | 1.39 (1.17-1.65)                     | <b>4.46E-04</b>      | 10.3                      | 1.34 (1.12-1.61)                     | <b>1.11E-02</b>      | 8.9                       |
| LPC(O-24:1) | 1.11 (0.94-1.30)                     | 2.62E-01             | 8.7                       | 1.32 (1.10-1.57)                     | <b>1.46E-02</b>      | 10.8                      |
| LPC(O-24:2) | 1.09 (0.91-1.30)                     | 3.82E-01             | 7.6                       | 0.93 (0.76-1.13)                     | 6.19E-01             | 0.6                       |
| PE 32:1     | 0.95 (0.85-1.07)                     | 4.82E-01             | -4.0                      | 1.34 (1.15-1.56)                     | <b>2.27E-03</b>      | 23.5                      |
| PE 34:1     | 0.97 (0.82-1.14)                     | 7.48E-01             | -2.5                      | 1.39 (1.17-1.65)                     | <b>1.88E-03</b>      | 11.7                      |
| PE 34:2     | 0.72 (0.60-0.87)                     | <b>1.15E-03</b>      | -12.6                     | 1.20 (0.99-1.45)                     | 1.45E-01             | 1.2                       |
| PE 34:3     | 0.70 (0.59-0.83)                     | <b>8.99E-05</b>      | -15.5                     | 1.24 (1.05-1.46)                     | <b>4.22E-02</b>      | 4.4                       |
| PE 35:1     | 0.92 (0.77-1.09)                     | 3.89E-01             | -4.1                      | 1.14 (0.95-1.38)                     | 2.96E-01             | 1.6                       |
| PE 35:2     | 0.75 (0.63-0.89)                     | <b>1.81E-03</b>      | -10.5                     | 0.99 (0.82-1.19)                     | 9.51E-01             | -4.5                      |
| PE 36:1     | 1.19 (1.00-1.42)                     | 6.54E-02             | 3.9                       | 1.38 (1.15-1.66)                     | <b>6.99E-03</b>      | 10.8                      |
| PE 36:2     | 0.89 (0.74-1.07)                     | 2.64E-01             | -5.2                      | 1.25 (1.03-1.51)                     | 8.20E-02             | 3.7                       |
| PE 36:3     | 0.74 (0.62-0.88)                     | <b>1.21E-03</b>      | -10.2                     | 1.09 (0.90-1.30)                     | 5.34E-01             | -1.7                      |
| PE 36:4     | 0.79 (0.66-0.94)                     | <b>1.56E-02</b>      | -8.3                      | 1.36 (1.13-1.63)                     | <b>9.25E-03</b>      | 6.0                       |

| Lipid      | Sex                                  |                      |                           | Smoking status                       |                      |                           |
|------------|--------------------------------------|----------------------|---------------------------|--------------------------------------|----------------------|---------------------------|
|            | IQR Odds Ratio (95% CI) <sup>a</sup> | p-value <sup>b</sup> | % Difference <sup>c</sup> | IQR Odds Ratio (95% CI) <sup>d</sup> | p-value <sup>b</sup> | % Difference <sup>e</sup> |
| PE 36:5    | 0.92 (0.79-1.08)                     | 3.82E-01             | -3.9                      | 1.37 (1.15-1.62)                     | <b>3.75E-03</b>      | 13.1                      |
| PE 38:3    | 0.79 (0.65-0.96)                     | <b>2.92E-02</b>      | -8.4                      | 1.20 (0.98-1.48)                     | 1.86E-01             | 1.3                       |
| PE 38:4    | 0.80 (0.66-0.97)                     | <b>3.57E-02</b>      | -7.4                      | 1.20 (0.98-1.47)                     | 1.88E-01             | 1.1                       |
| PE 38:5    | 0.68 (0.56-0.81)                     | <b>8.17E-05</b>      | -11.5                     | 1.10 (0.91-1.34)                     | 4.84E-01             | -2.0                      |
| PE 38:6    | 0.64 (0.53-0.77)                     | <b>1.05E-05</b>      | -17.6                     | 1.09 (0.91-1.31)                     | 4.95E-01             | -3.5                      |
| PE 40:5    | 0.86 (0.75-1.00)                     | 6.50E-02             | -9.3                      | 1.20 (1.04-1.39)                     | 5.50E-02             | 5.0                       |
| PE 40:6    | 0.71 (0.59-0.85)                     | <b>5.72E-04</b>      | -16.4                     | 1.04 (0.86-1.27)                     | 7.92E-01             | -4.9                      |
| PE 40:7    | 0.59 (0.49-0.70)                     | <b>3.67E-08</b>      | -22.5                     | 0.91 (0.76-1.09)                     | 4.85E-01             | -11.3                     |
| PE(O-34:1) | 0.88 (0.75-1.04)                     | 1.77E-01             | -2.9                      | 0.96 (0.79-1.15)                     | 7.55E-01             | -2.5                      |
| PE(O-34:2) | 0.69 (0.58-0.81)                     | <b>3.28E-05</b>      | -10.8                     | 0.95 (0.79-1.13)                     | 6.88E-01             | -4.5                      |
| PE(O-36:2) | 0.69 (0.58-0.83)                     | <b>1.22E-04</b>      | -8.0                      | 0.93 (0.76-1.13)                     | 6.19E-01             | -4.2                      |
| PE(O-36:3) | 0.63 (0.52-0.75)                     | <b>2.59E-06</b>      | -12.1                     | 0.86 (0.70-1.05)                     | 2.74E-01             | -7.2                      |
| PE(O-36:4) | 0.86 (0.73-1.01)                     | 9.67E-02             | -5.2                      | 0.93 (0.77-1.12)                     | 5.80E-01             | -3.6                      |
| PE(O-36:5) | 1.06 (0.94-1.20)                     | 3.70E-01             | 4.1                       | 0.99 (0.86-1.14)                     | 9.50E-01             | 1.0                       |
| PE(O-38:4) | 0.84 (0.71-0.98)                     | <b>3.91E-02</b>      | -6.6                      | 0.96 (0.81-1.15)                     | 8.09E-01             | -2.8                      |
| PE(O-38:5) | 0.87 (0.74-1.02)                     | 1.23E-01             | -5.0                      | 0.92 (0.76-1.10)                     | 5.14E-01             | -4.0                      |
| PE(O-38:6) | 1.18 (1.00-1.39)                     | 7.19E-02             | 1.5                       | 0.77 (0.63-0.94)                     | <b>3.82E-02</b>      | -5.6                      |
| PE(O-40:5) | 0.88 (0.74-1.05)                     | 1.85E-01             | -4.0                      | 0.82 (0.68-1.01)                     | 1.45E-01             | -5.7                      |
| PE(O-40:6) | 0.83 (0.70-1.00)                     | 7.03E-02             | -4.3                      | 0.83 (0.67-1.02)                     | 1.66E-01             | -5.3                      |
| PE(O-40:7) | 0.76 (0.64-0.90)                     | <b>2.28E-03</b>      | -7.8                      | 0.67 (0.55-0.82)                     | <b>1.36E-03</b>      | -10.7                     |
| PE(P-34:1) | 1.46 (1.23-1.73)                     | <b>6.22E-05</b>      | 9.2                       | 0.93 (0.77-1.12)                     | 6.11E-01             | 0.1                       |
| PE(P-34:2) | 1.41 (1.19-1.68)                     | <b>2.03E-04</b>      | 8.4                       | 0.75 (0.62-0.92)                     | <b>2.57E-02</b>      | -5.5                      |
| PE(P-36:4) | 1.52 (1.28-1.81)                     | <b>1.14E-05</b>      | 8.2                       | 0.74 (0.60-0.91)                     | <b>2.30E-02</b>      | -6.0                      |
| PE(P-38:6) | 1.03 (0.87-1.22)                     | 7.48E-01             | -2.0                      | 0.72 (0.59-0.88)                     | <b>1.02E-02</b>      | -8.1                      |
| PE(P-36:1) | 1.51 (1.27-1.79)                     | <b>1.18E-05</b>      | 12.2                      | 0.93 (0.78-1.11)                     | 5.93E-01             | 0.1                       |
| PE(P-36:2) | 1.38 (1.17-1.62)                     | <b>3.02E-04</b>      | 8.6                       | 0.83 (0.69-1.00)                     | 1.25E-01             | -3.2                      |
| PE(P-36:4) | 1.52 (1.28-1.81)                     | <b>1.14E-05</b>      | 8.2                       | 0.74 (0.60-0.91)                     | <b>2.30E-02</b>      | -6.0                      |
| PE(P-40:5) | 0.85 (0.70-1.02)                     | 1.11E-01             | -4.0                      | 0.80 (0.65-0.99)                     | 1.15E-01             | -5.7                      |
| PE(P-40:6) | 1.04 (0.89-1.22)                     | 6.63E-01             | -1.5                      | 0.68 (0.55-0.83)                     | <b>1.85E-03</b>      | -9.9                      |
| LPE 16:0   | 1.10 (0.94-1.28)                     | 2.98E-01             | 5.0                       | 1.23 (1.04-1.45)                     | 5.36E-02             | 6.7                       |
| LPE 18:0   | 1.22 (1.03-1.45)                     | <b>3.44E-02</b>      | 6.0                       | 1.10 (0.91-1.32)                     | 4.93E-01             | 3.0                       |
| LPE 18:1   | 1.52 (1.30-1.77)                     | <b>9.32E-07</b>      | 19.7                      | 1.26 (1.08-1.46)                     | <b>1.59E-02</b>      | 12.7                      |

| Lipid    | Sex                                  |                      |                           | Smoking status                       |                      |                           |
|----------|--------------------------------------|----------------------|---------------------------|--------------------------------------|----------------------|---------------------------|
|          | IQR Odds Ratio (95% CI) <sup>a</sup> | p-value <sup>b</sup> | % Difference <sup>c</sup> | IQR Odds Ratio (95% CI) <sup>d</sup> | p-value <sup>b</sup> | % Difference <sup>e</sup> |
| LPE 18:2 | 1.13 (0.97-1.32)                     | 1.54E-01             | 6.7                       | 1.29 (1.10-1.51)                     | <b>1.20E-02</b>      | 9.3                       |
| LPE 20:4 | 1.50 (1.27-1.78)                     | <b>1.15E-05</b>      | 13.3                      | 1.11 (0.92-1.33)                     | 4.43E-01             | 5.3                       |
| LPE 22:6 | 0.94 (0.80-1.10)                     | 4.82E-01             | -1.1                      | 0.94 (0.78-1.13)                     | 6.44E-01             | -2.7                      |
| PI 32:0  | 0.76 (0.65-0.88)                     | <b>5.72E-04</b>      | -21.1                     | 1.19 (1.03-1.37)                     | 5.78E-02             | 4.4                       |
| PI 32:1  | 1.00 (0.87-1.14)                     | 9.64E-01             | -1.3                      | 1.31 (1.13-1.51)                     | <b>3.03E-03</b>      | 22.5                      |
| PI 34:0  | 0.77 (0.67-0.89)                     | <b>4.95E-04</b>      | -16.7                     | 1.15 (1.01-1.32)                     | 1.01E-01             | 2.4                       |
| PI 34:1  | 1.04 (0.89-1.22)                     | 6.51E-01             | 2.5                       | 1.45 (1.23-1.71)                     | <b>2.82E-04</b>      | 16.0                      |
| PI 36:0  | 0.99 (0.84-1.17)                     | 9.46E-01             | -1.0                      | 1.26 (1.06-1.50)                     | <b>3.71E-02</b>      | 9.9                       |
| PI 36:1  | 1.05 (0.90-1.22)                     | 6.10E-01             | 3.4                       | 1.37 (1.16-1.61)                     | <b>1.92E-03</b>      | 10.8                      |
| PI 36:2  | 0.68 (0.57-0.81)                     | <b>6.22E-05</b>      | -7.6                      | 1.17 (0.97-1.41)                     | 2.19E-01             | 0.6                       |
| PI 36:3  | 0.64 (0.54-0.76)                     | <b>2.49E-06</b>      | -10.4                     | 0.97 (0.80-1.17)                     | 8.38E-01             | -4.1                      |
| PI 36:4  | 0.84 (0.70-1.00)                     | 7.19E-02             | -6.6                      | 1.08 (0.89-1.31)                     | 5.86E-01             | -0.2                      |
| PI 38:2  | 0.80 (0.69-0.94)                     | <b>9.24E-03</b>      | -6.6                      | 1.10 (0.94-1.30)                     | 3.95E-01             | 0.6                       |
| PI 38:3  | 1.04 (0.88-1.24)                     | 6.77E-01             | -0.7                      | 0.97 (0.80-1.18)                     | 8.38E-01             | -1.6                      |
| PI 38:4  | 1.03 (0.86-1.24)                     | 7.87E-01             | -0.9                      | 0.93 (0.76-1.15)                     | 6.60E-01             | -1.9                      |
| PI 38:5  | 0.67 (0.56-0.80)                     | <b>2.33E-05</b>      | -11.5                     | 0.79 (0.65-0.96)                     | 6.15E-02             | -9.2                      |
| PI 38:6  | 0.74 (0.62-0.88)                     | <b>1.13E-03</b>      | -7.2                      | 1.16 (0.97-1.39)                     | 2.19E-01             | 1.6                       |
| PI 40:4  | 1.14 (0.96-1.35)                     | 1.74E-01             | 3.1                       | 1.26 (1.05-1.52)                     | 5.36E-02             | 6.0                       |
| PI 40:5  | 1.29 (1.08-1.52)                     | <b>6.58E-03</b>      | 5.7                       | 1.24 (1.03-1.49)                     | 7.25E-02             | 7.2                       |
| PI 40:6  | 0.84 (0.71-0.99)                     | 5.08E-02             | -4.1                      | 1.23 (1.03-1.47)                     | 7.18E-02             | 3.9                       |
| PS 36:1  | 0.75 (0.64-0.88)                     | <b>8.54E-04</b>      | -17.5                     | 0.90 (0.76-1.07)                     | 3.87E-01             | -10.5                     |
| PS 36:2  | 0.67 (0.56-0.80)                     | <b>3.93E-05</b>      | -20.0                     | 0.84 (0.69-1.02)                     | 1.80E-01             | -13.3                     |
| PS 38:3  | 0.77 (0.66-0.90)                     | <b>1.48E-03</b>      | -17.6                     | 0.87 (0.73-1.03)                     | 2.14E-01             | -13.4                     |
| PS 38:4  | 0.79 (0.68-0.92)                     | <b>3.52E-03</b>      | -14.8                     | 0.86 (0.72-1.02)                     | 2.02E-01             | -12.2                     |
| PS 38:5  | 0.66 (0.56-0.79)                     | <b>1.53E-05</b>      | -21.6                     | 0.78 (0.64-0.95)                     | 5.50E-02             | -17.2                     |
| PS 40:5  | 0.96 (0.84-1.09)                     | 5.49E-01             | -6.7                      | 0.89 (0.76-1.04)                     | 2.74E-01             | -10.1                     |
| PS 40:6  | 0.86 (0.74-1.00)                     | 7.46E-02             | -8.5                      | 0.95 (0.80-1.12)                     | 6.81E-01             | -5.1                      |
| PG 34:1  | 0.97 (0.83-1.15)                     | 7.88E-01             | -0.3                      | 1.29 (1.08-1.54)                     | <b>2.34E-02</b>      | 8.4                       |
| PG 34:2  | 0.88 (0.75-1.02)                     | 1.26E-01             | -12.0                     | 0.98 (0.82-1.16)                     | 8.80E-01             | -6.3                      |
| PG 36:1  | 1.56 (1.31-1.85)                     | <b>2.05E-06</b>      | 18.3                      | 1.33 (1.12-1.57)                     | <b>7.92E-03</b>      | 17.0                      |
| PG 36:2  | 1.38 (1.16-1.64)                     | <b>5.71E-04</b>      | 9.1                       | 1.10 (0.91-1.32)                     | 4.89E-01             | 4.3                       |
| CE 14:0  | 1.47 (1.24-1.73)                     | <b>2.05E-05</b>      | 14.4                      | 1.17 (0.99-1.38)                     | 1.45E-01             | 10.0                      |



| Lipid        | Sex                                  |                      |                           | Smoking status                       |                      |                           |
|--------------|--------------------------------------|----------------------|---------------------------|--------------------------------------|----------------------|---------------------------|
|              | IQR Odds Ratio (95% CI) <sup>a</sup> | p-value <sup>b</sup> | % Difference <sup>c</sup> | IQR Odds Ratio (95% CI) <sup>d</sup> | p-value <sup>b</sup> | % Difference <sup>e</sup> |
| CE 15:0      | 1.20 (1.03-1.41)                     | <b>3.14E-02</b>      | 1.8                       | 0.74 (0.61-0.89)                     | <b>1.27E-02</b>      | -8.7                      |
| CE 16:0      | 1.28 (1.08-1.52)                     | <b>7.75E-03</b>      | 2.1                       | 1.06 (0.88-1.27)                     | 6.88E-01             | 1.2                       |
| CE 16:1      | 1.26 (1.07-1.48)                     | <b>8.46E-03</b>      | 11.2                      | 1.50 (1.27-1.77)                     | <b>8.76E-05</b>      | 24.7                      |
| CE 16:2      | 1.22 (1.03-1.45)                     | <b>3.14E-02</b>      | 2.5                       | 0.99 (0.82-1.20)                     | 9.57E-01             | -0.7                      |
| CE 17:0      | 1.46 (1.24-1.71)                     | <b>1.70E-05</b>      | 9.9                       | 0.81 (0.68-0.97)                     | 7.46E-02             | -3.7                      |
| CE 17:1      | 1.22 (1.02-1.45)                     | <b>3.95E-02</b>      | 1.6                       | 0.93 (0.76-1.13)                     | 6.06E-01             | -1.3                      |
| CE 18:0      | 1.51 (1.26-1.80)                     | <b>1.96E-05</b>      | 7.9                       | 0.84 (0.69-1.02)                     | 1.92E-01             | -2.1                      |
| CE 18:1      | 1.47 (1.23-1.76)                     | <b>5.82E-05</b>      | 6.9                       | 1.31 (1.09-1.58)                     | <b>2.30E-02</b>      | 6.2                       |
| CE 18:2      | 1.53 (1.31-1.79)                     | <b>6.59E-07</b>      | 7.9                       | 1.12 (0.95-1.32)                     | 3.38E-01             | 3.6                       |
| CE 18:3      | 1.35 (1.14-1.60)                     | <b>8.15E-04</b>      | 9.2                       | 1.18 (0.99-1.41)                     | 1.56E-01             | 8.0                       |
| CE 20:1      | 1.37 (1.16-1.61)                     | <b>4.31E-04</b>      | 10.1                      | 0.93 (0.77-1.11)                     | 5.80E-01             | 0.8                       |
| CE 20:2      | 0.97 (0.82-1.15)                     | 7.91E-01             | -1.5                      | 0.87 (0.72-1.05)                     | 2.75E-01             | -3.2                      |
| CE 20:3      | 1.43 (1.19-1.72)                     | <b>3.40E-04</b>      | 5.6                       | 1.19 (0.98-1.45)                     | 1.76E-01             | 5.9                       |
| CE 20:4      | 1.41 (1.20-1.65)                     | <b>7.06E-05</b>      | 7.7                       | 1.00 (0.84-1.19)                     | 9.70E-01             | 1.0                       |
| CE 20:5      | 1.44 (1.24-1.67)                     | <b>5.92E-06</b>      | 17.5                      | 0.97 (0.83-1.13)                     | 8.13E-01             | 1.6                       |
| CE 22:0      | 1.67 (1.43-1.95)                     | <b>1.50E-09</b>      | 24.9                      | 0.96 (0.82-1.11)                     | 6.90E-01             | 2.8                       |
| CE 22:1      | 1.57 (1.34-1.83)                     | <b>1.45E-07</b>      | 20.8                      | 0.98 (0.84-1.14)                     | 8.61E-01             | 3.7                       |
| CE 22:4      | 1.48 (1.23-1.79)                     | <b>9.38E-05</b>      | 10.2                      | 1.38 (1.13-1.69)                     | <b>1.02E-02</b>      | 10.2                      |
| CE 22:5      | 1.28 (1.07-1.54)                     | <b>1.07E-02</b>      | 5.2                       | 1.17 (0.96-1.43)                     | 2.32E-01             | 5.0                       |
| CE 22:6      | 1.15 (0.98-1.34)                     | 1.21E-01             | 1.1                       | 0.91 (0.76-1.09)                     | 4.75E-01             | -4.0                      |
| CE 24:0      | 1.81 (1.54-2.13)                     | <b>2.60E-11</b>      | 27.4                      | 1.01 (0.87-1.18)                     | 9.25E-01             | 6.2                       |
| CE 24:1      | 1.60 (1.36-1.89)                     | <b>2.08E-07</b>      | 18.6                      | 1.18 (1.01-1.39)                     | 1.17E-01             | 10.1                      |
| CE 24:4      | 1.10 (0.95-1.28)                     | 2.57E-01             | 8.8                       | 1.25 (1.05-1.47)                     | <b>4.12E-02</b>      | 10.7                      |
| CE 24:5      | 1.63 (1.39-1.92)                     | <b>4.15E-08</b>      | 19.4                      | 1.09 (0.92-1.29)                     | 4.89E-01             | 7.1                       |
| CE 24:6      | 1.29 (1.11-1.51)                     | <b>1.86E-03</b>      | 13.6                      | 1.02 (0.87-1.20)                     | 8.83E-01             | 3.1                       |
| COH          | 0.99 (0.83-1.18)                     | 9.45E-01             | -0.6                      | 1.01 (0.83-1.23)                     | 9.50E-01             | -0.4                      |
| DG 14:0/16:0 | 1.30 (1.15-1.46)                     | <b>6.22E-05</b>      | 24.4                      | 1.14 (1.01-1.28)                     | 1.03E-01             | 18.7                      |
| DG 14:0/18:1 | 1.42 (1.23-1.65)                     | <b>8.14E-06</b>      | 24.1                      | 1.13 (0.98-1.31)                     | 2.09E-01             | 13.7                      |
| DG 16:0/16:0 | 1.35 (1.19-1.54)                     | <b>1.92E-05</b>      | 18.2                      | 1.21 (1.06-1.37)                     | <b>2.46E-02</b>      | 19.3                      |
| DG 16:0/18:0 | 1.50 (1.30-1.72)                     | <b>2.08E-07</b>      | 25.2                      | 1.20 (1.05-1.37)                     | <b>3.71E-02</b>      | 17.9                      |
| DG 16:0/18:1 | 1.54 (1.31-1.81)                     | <b>9.63E-07</b>      | 17.2                      | 1.23 (1.04-1.44)                     | 5.31E-02             | 13.5                      |
| DG 16:0/18:2 | 1.44 (1.22-1.69)                     | <b>3.93E-05</b>      | 11.5                      | 1.06 (0.89-1.25)                     | 6.70E-01             | 3.7                       |

| Lipid             | Sex                                  |                      |                           | Smoking status                       |                      |                           |
|-------------------|--------------------------------------|----------------------|---------------------------|--------------------------------------|----------------------|---------------------------|
|                   | IQR Odds Ratio (95% CI) <sup>a</sup> | p-value <sup>b</sup> | % Difference <sup>c</sup> | IQR Odds Ratio (95% CI) <sup>d</sup> | p-value <sup>b</sup> | % Difference <sup>e</sup> |
| DG 16:0/20:3      | 1.60 (1.36-1.89)                     | <b>1.96E-07</b>      | 21.2                      | 1.20 (1.02-1.41)                     | 9.18E-02             | 13.7                      |
| DG 16:0/20:4      | 1.43 (1.23-1.65)                     | <b>7.25E-06</b>      | 18.3                      | 1.13 (0.99-1.30)                     | 1.78E-01             | 11.5                      |
| DG 16:0/22:5      | 1.62 (1.37-1.90)                     | <b>7.71E-08</b>      | 21.2                      | 1.11 (0.94-1.30)                     | 3.60E-01             | 8.3                       |
| DG 16:0/22:6      | 1.45 (1.25-1.67)                     | <b>2.66E-06</b>      | 22.1                      | 0.99 (0.86-1.15)                     | 9.51E-01             | 1.3                       |
| DG 16:1/18:0      | 1.33 (1.16-1.51)                     | <b>8.75E-05</b>      | 22.6                      | 1.24 (1.09-1.40)                     | <b>8.48E-03</b>      | 24.6                      |
| DG 16:1/18:1      | 1.27 (1.09-1.48)                     | <b>3.73E-03</b>      | 10.4                      | 1.25 (1.07-1.45)                     | <b>2.83E-02</b>      | 14.3                      |
| DG 18:0/18:1      | 1.51 (1.29-1.78)                     | <b>2.59E-06</b>      | 22.9                      | 1.16 (1.02-1.32)                     | 8.55E-02             | 14.7                      |
| DG 18:0/18:2      | 1.49 (1.26-1.76)                     | <b>1.18E-05</b>      | 17.4                      | 1.06 (0.92-1.22)                     | 5.94E-01             | 5.9                       |
| DG 18:0/20:4      | 1.51 (1.28-1.78)                     | <b>4.94E-06</b>      | 13.5                      | 1.11 (0.95-1.31)                     | 3.36E-01             | 6.5                       |
| DG 18:1/18:1      | 1.50 (1.28-1.75)                     | <b>2.59E-06</b>      | 16.8                      | 1.16 (0.99-1.35)                     | 1.60E-01             | 10.2                      |
| DG 18:1/18:2      | 1.40 (1.19-1.64)                     | <b>1.45E-04</b>      | 11.1                      | 0.97 (0.82-1.16)                     | 8.58E-01             | 0.0                       |
| DG 18:1/18:3      | 1.35 (1.17-1.55)                     | <b>9.33E-05</b>      | 14.9                      | 1.01 (0.87-1.16)                     | 9.57E-01             | 2.7                       |
| DG 18:1/20:3      | 1.53 (1.30-1.79)                     | <b>1.13E-06</b>      | 20.2                      | 1.15 (1.00-1.34)                     | 1.45E-01             | 11.7                      |
| DG 18:1/20:4      | 1.48 (1.26-1.73)                     | <b>6.67E-06</b>      | 15.5                      | 1.08 (0.92-1.26)                     | 4.95E-01             | 5.9                       |
| DG 18:2/18:2      | 1.21 (1.06-1.39)                     | <b>1.02E-02</b>      | 8.8                       | 0.91 (0.78-1.06)                     | 3.60E-01             | -5.4                      |
| TG 14:0/16:0/18:1 | 1.39 (1.20-1.62)                     | <b>6.21E-05</b>      | 17.8                      | 1.17 (1.00-1.37)                     | 1.44E-01             | 13.4                      |
| TG 14:0/16:0/18:2 | 1.24 (1.08-1.43)                     | <b>5.46E-03</b>      | 11.5                      | 1.17 (1.01-1.36)                     | 9.66E-02             | 13.5                      |
| TG 14:0/16:1/18:1 | 1.20 (1.05-1.37)                     | <b>1.15E-02</b>      | 12.7                      | 1.17 (1.02-1.34)                     | 7.71E-02             | 15.5                      |
| TG 14:0/16:1/18:2 | 1.10 (0.97-1.24)                     | 1.56E-01             | 5.1                       | 1.04 (0.91-1.19)                     | 7.09E-01             | 4.1                       |
| TG 14:0/17:0/18:1 | 1.38 (1.19-1.60)                     | <b>7.07E-05</b>      | 13.6                      | 0.97 (0.82-1.15)                     | 8.37E-01             | 0.2                       |
| TG 14:0/18:0/18:1 | 1.53 (1.32-1.77)                     | <b>1.76E-07</b>      | 31.6                      | 1.16 (1.01-1.34)                     | 1.17E-01             | 18.0                      |
| TG 14:0/18:2/18:2 | 1.24 (1.08-1.41)                     | <b>3.40E-03</b>      | 12.1                      | 0.91 (0.78-1.06)                     | 3.85E-01             | -3.5                      |
| TG 14:1/16:0/18:1 | 1.25 (1.09-1.44)                     | <b>3.39E-03</b>      | 14.2                      | 1.19 (1.04-1.37)                     | 5.50E-02             | 16.3                      |
| TG 14:1/16:1/18:0 | 1.15 (1.01-1.31)                     | <b>4.31E-02</b>      | 11.9                      | 1.23 (1.09-1.39)                     | <b>8.48E-03</b>      | 27.5                      |
| TG 14:1/18:0/18:2 | 1.28 (1.10-1.47)                     | <b>1.81E-03</b>      | 12.5                      | 1.12 (0.97-1.29)                     | 2.74E-01             | 9.2                       |
| TG 14:1/18:1/18:1 | 1.31 (1.12-1.54)                     | <b>1.45E-03</b>      | 10.3                      | 1.09 (0.92-1.30)                     | 4.76E-01             | 5.8                       |
| TG 15:0/16:0/18:1 | 1.37 (1.18-1.59)                     | <b>9.33E-05</b>      | 13.4                      | 1.03 (0.87-1.22)                     | 8.21E-01             | 3.3                       |
| TG 15:0/18:1/18:1 | 1.41 (1.22-1.64)                     | <b>1.98E-05</b>      | 13.2                      | 0.89 (0.75-1.06)                     | 3.55E-01             | -2.5                      |
| TG 16:0/16:0/16:0 | 1.31 (1.16-1.49)                     | <b>6.69E-05</b>      | 22.8                      | 1.18 (1.05-1.34)                     | <b>3.41E-02</b>      | 23.5                      |
| TG 16:0/16:0/18:0 | 1.50 (1.31-1.71)                     | <b>3.32E-08</b>      | 37.6                      | 1.18 (1.04-1.34)                     | <b>4.35E-02</b>      | 24.5                      |
| TG 16:0/16:0/18:1 | 1.53 (1.30-1.81)                     | <b>2.59E-06</b>      | 15.0                      | 1.29 (1.09-1.54)                     | <b>1.74E-02</b>      | 15.7                      |
| TG 16:0/16:0/18:2 | 1.44 (1.22-1.71)                     | <b>5.82E-05</b>      | 8.7                       | 1.10 (0.91-1.32)                     | 4.88E-01             | 4.2                       |

| Lipid             | Sex                                  |                      |                           | Smoking status                       |                      |                           |
|-------------------|--------------------------------------|----------------------|---------------------------|--------------------------------------|----------------------|---------------------------|
|                   | IQR Odds Ratio (95% CI) <sup>a</sup> | p-value <sup>b</sup> | % Difference <sup>c</sup> | IQR Odds Ratio (95% CI) <sup>d</sup> | p-value <sup>b</sup> | % Difference <sup>e</sup> |
| TG 16:0/16:1/17:0 | 1.37 (1.18-1.59)                     | <b>1.00E-04</b>      | 12.7                      | 1.06 (0.90-1.25)                     | 6.14E-01             | 5.2                       |
| TG 16:0/16:1/18:1 | 1.31 (1.12-1.53)                     | <b>1.82E-03</b>      | 9.5                       | 1.31 (1.11-1.54)                     | <b>1.05E-02</b>      | 15.2                      |
| TG 16:0/17:0/18:0 | 1.31 (1.17-1.47)                     | <b>1.89E-05</b>      | 32.0                      | 1.08 (0.97-1.22)                     | 3.09E-01             | 15.7                      |
| TG 16:0/17:0/18:1 | 1.50 (1.29-1.75)                     | <b>1.42E-06</b>      | 17.8                      | 1.07 (0.91-1.25)                     | 5.80E-01             | 6.3                       |
| TG 16:0/17:0/18:2 | 1.42 (1.21-1.67)                     | <b>5.17E-05</b>      | 10.9                      | 1.11 (0.93-1.32)                     | 4.04E-01             | 6.2                       |
| TG 16:0/18:0/18:1 | 1.59 (1.37-1.84)                     | <b>7.48E-09</b>      | 29.9                      | 1.20 (1.05-1.38)                     | <b>3.41E-02</b>      | 19.7                      |
| TG 16:0/18:1/18:1 | 1.62 (1.36-1.92)                     | <b>2.57E-07</b>      | 13.5                      | 1.23 (1.03-1.47)                     | 7.25E-02             | 10.1                      |
| TG 16:0/18:1/18:2 | 1.41 (1.20-1.67)                     | <b>1.42E-04</b>      | 7.5                       | 0.97 (0.80-1.16)                     | 8.35E-01             | -0.2                      |
| TG 16:0/18:2/18:2 | 1.28 (1.10-1.50)                     | <b>2.53E-03</b>      | 7.3                       | 0.89 (0.75-1.05)                     | 3.12E-01             | -4.5                      |
| TG 16:1/16:1/16:1 | 1.12 (0.97-1.29)                     | 1.45E-01             | 6.7                       | 1.18 (1.03-1.34)                     | 6.16E-02             | 14.5                      |
| TG 16:1/16:1/18:0 | 1.43 (1.24-1.66)                     | <b>7.59E-06</b>      | 23.2                      | 1.15 (1.00-1.33)                     | 1.39E-01             | 14.3                      |
| TG 16:1/16:1/18:1 | 1.13 (0.96-1.32)                     | 1.74E-01             | 1.5                       | 1.20 (1.01-1.41)                     | 9.99E-02             | 8.0                       |
| TG 16:1/17:0/18:1 | 1.40 (1.20-1.63)                     | <b>6.22E-05</b>      | 11.5                      | 1.05 (0.88-1.24)                     | 7.34E-01             | 3.9                       |
| TG 16:1/18:1/18:1 | 1.37 (1.16-1.61)                     | <b>3.52E-04</b>      | 10.7                      | 1.19 (1.00-1.41)                     | 1.31E-01             | 9.3                       |
| TG 16:1/18:1/18:2 | 1.30 (1.11-1.53)                     | <b>2.24E-03</b>      | 7.7                       | 0.97 (0.82-1.16)                     | 8.48E-01             | 0.3                       |
| TG 17:0/18:1/18:1 | 1.47 (1.26-1.70)                     | <b>2.78E-06</b>      | 18.0                      | 1.19 (1.03-1.37)                     | 6.07E-02             | 14.3                      |
| TG 18:0/18:0/18:1 | 1.35 (1.09-1.66)                     | <b>8.58E-03</b>      | 43.1                      | 1.08 (1.00-1.17)                     | 1.60E-01             | 25.3                      |
| TG 18:0/18:1/18:1 | 1.59 (1.30-1.95)                     | <b>2.94E-05</b>      | 28.0                      | 1.17 (1.03-1.32)                     | 5.14E-02             | 18.8                      |
| TG 18:0/18:2/18:2 | 1.27 (1.12-1.44)                     | <b>5.29E-04</b>      | 17.7                      | 0.97 (0.85-1.10)                     | 7.34E-01             | 2.1                       |
| TG 18:1/18:1/18:1 | 1.52 (1.31-1.75)                     | <b>2.02E-07</b>      | 19.7                      | 1.16 (1.02-1.33)                     | 8.55E-02             | 13.1                      |
| TG 18:1/18:1/18:2 | 1.45 (1.24-1.70)                     | <b>1.08E-05</b>      | 16.9                      | 1.01 (0.86-1.18)                     | 9.51E-01             | 4.2                       |
| TG 18:1/18:1/20:4 | 1.65 (1.38-1.96)                     | <b>2.08E-07</b>      | 13.8                      | 1.07 (0.89-1.27)                     | 6.40E-01             | 5.1                       |
| TG 18:1/18:1/22:6 | 1.69 (1.42-2.00)                     | <b>3.00E-08</b>      | 15.4                      | 1.06 (0.89-1.26)                     | 6.58E-01             | 5.4                       |
| TG 18:1/18:2/18:2 | 1.36 (1.18-1.56)                     | <b>6.13E-05</b>      | 15.9                      | 0.95 (0.82-1.10)                     | 6.50E-01             | 0.9                       |
| TG 18:2/18:2/18:2 | 1.27 (1.12-1.44)                     | <b>3.80E-04</b>      | 21.6                      | 0.95 (0.84-1.08)                     | 6.14E-01             | 0.9                       |
| TG 18:2/18:2/20:4 | 1.23 (1.08-1.39)                     | <b>2.53E-03</b>      | 20.5                      | 1.07 (0.97-1.18)                     | 3.07E-01             | 16.5                      |

<sup>a</sup> Adjusted for age, BMI, SBP, 2hr post load glucose and smoking status.

<sup>b</sup> Benjamini & Hochberg corrected. Bold type indicates p<0.05.

<sup>c</sup> Male relative to female.

<sup>d</sup> Adjusted for sex, age, BMI, SBP and 2hr post load glucose.

<sup>e</sup> Smoking relative to non smoking

<sup>f</sup> The designation of "a" and "b" refers to 2 isomers that were able to be chromatographically separated.

Supplementary Table 3: Linear regression of lipid groups with age and, body mass index

| Lipids     | Age <sup>a</sup>                             |                      | Body Mass Index <sup>b</sup>                 |                      |
|------------|----------------------------------------------|----------------------|----------------------------------------------|----------------------|
|            | $\beta$ coefficient<br>(95% CI) <sup>c</sup> | p-value <sup>d</sup> | $\beta$ coefficient<br>(95% CI) <sup>e</sup> | p-value <sup>d</sup> |
| dhCer 16:0 | 1.43 (0.62-2.23)                             | <b>2.18E-03</b>      | 0.85 (0.47-1.23)                             | <b>3.64E-05</b>      |
| dhCer 18:0 | 0.12 (-0.85-1.09)                            | 8.46E-01             | 2.21 (1.80-2.63)                             | <b>1.61E-22</b>      |
| dhCer 20:0 | 0.59 (-0.48-1.67)                            | 3.80E-01             | 1.74 (1.25-2.23)                             | <b>3.85E-11</b>      |
| dhCer 22:0 | 0.16 (-0.87-1.19)                            | 8.10E-01             | 2.06 (1.61-2.51)                             | <b>5.81E-17</b>      |
| dhCer 24:0 | 0.43 (-0.57-1.44)                            | 5.00E-01             | 1.54 (1.09-2.00)                             | <b>4.17E-10</b>      |
| dhCer 24:1 | 1.25 (0.30-2.21)                             | <b>2.41E-02</b>      | 1.74 (1.31-2.17)                             | <b>9.67E-14</b>      |
| Cer 16:0   | 4.64 (3.54-5.73)                             | <b>9.19E-14</b>      | 0.43 (-0.12-0.98)                            | 1.70E-01             |
| Cer 18:0   | 2.10 (1.02-3.17)                             | <b>7.69E-04</b>      | 1.89 (1.40-2.38)                             | <b>1.29E-12</b>      |
| Cer 20:0   | 3.57 (2.52-4.61)                             | <b>1.25E-09</b>      | 0.72 (0.21-1.23)                             | <b>1.04E-02</b>      |
| Cer 22:0   | 2.39 (1.37-3.41)                             | <b>4.57E-05</b>      | 0.47 (-0.02-0.96)                            | 8.55E-02             |
| Cer 24:0   | 2.83 (1.79-3.87)                             | <b>1.69E-06</b>      | -0.24 (-0.74-0.27)                           | 4.13E-01             |
| Cer 24:1   | 4.37 (3.31-5.43)                             | <b>1.56E-13</b>      | 0.13 (-0.40-0.67)                            | 6.77E-01             |
| MHC 16:0   | 1.43 (0.37-2.49)                             | <b>1.93E-02</b>      | 0.39 (-0.11-0.89)                            | 1.70E-01             |
| MHC 18:0   | 2.05 (1.06-3.04)                             | <b>3.19E-04</b>      | -0.50 (-0.97--0.03)                          | 5.84E-02             |
| MHC 20:0   | 2.30 (1.31-3.29)                             | <b>5.21E-05</b>      | -0.47 (-0.94-0.01)                           | 7.92E-02             |
| MHC 22:0   | 1.37 (0.37-2.36)                             | <b>1.76E-02</b>      | -0.61 (-1.08--0.14)                          | <b>1.85E-02</b>      |
| MHC 24:0   | 1.78 (0.73-2.82)                             | <b>3.33E-03</b>      | -0.78 (-1.28--0.29)                          | <b>4.12E-03</b>      |
| MHC 24:1   | 1.71 (0.67-2.75)                             | <b>4.44E-03</b>      | -0.80 (-1.29--0.31)                          | <b>3.09E-03</b>      |
| DHC 16:0   | 0.54 (-0.55-1.64)                            | 4.30E-01             | -0.65 (-1.16--0.13)                          | <b>2.40E-02</b>      |
| DHC 18:0   | 2.06 (1.07-3.05)                             | <b>3.05E-04</b>      | 0.38 (-0.09-0.86)                            | 1.54E-01             |
| DHC 20:0   | 1.02 (0.01-2.02)                             | 8.55E-02             | -0.09 (-0.57-0.39)                           | 7.59E-01             |
| DHC 22:0   | 1.08 (0.13-2.03)                             | 5.37E-02             | -0.40 (-0.85-0.04)                           | 1.08E-01             |
| DHC 24:0   | 1.73 (0.73-2.74)                             | <b>2.76E-03</b>      | -0.76 (-1.24--0.28)                          | <b>3.72E-03</b>      |
| DHC 24:1   | 1.66 (0.63-2.70)                             | <b>5.37E-03</b>      | -1.15 (-1.63--0.66)                          | <b>1.24E-05</b>      |
| THC 16:0   | 2.31 (1.30-3.32)                             | <b>6.99E-05</b>      | -0.74 (-1.23--0.26)                          | <b>4.91E-03</b>      |
| THC 18:0   | 2.93 (1.99-3.87)                             | <b>3.46E-08</b>      | -0.91 (-1.36--0.45)                          | <b>2.40E-04</b>      |
| THC 20:0   | 2.14 (1.14-3.14)                             | <b>2.02E-04</b>      | -0.95 (-1.43--0.48)                          | <b>2.31E-04</b>      |
| THC 22:0   | 2.00 (0.95-3.06)                             | <b>1.05E-03</b>      | -1.66 (-2.15--1.18)                          | <b>2.01E-10</b>      |
| THC 24:0   | 2.82 (1.81-3.84)                             | <b>1.26E-06</b>      | -1.71 (-2.19--1.24)                          | <b>2.22E-11</b>      |
| THC 24:1   | 4.15 (3.14-5.16)                             | <b>1.56E-13</b>      | -1.51 (-2.00--1.02)                          | <b>1.26E-08</b>      |
| GM3 16:0   | 2.42 (1.38-3.45)                             | <b>5.21E-05</b>      | -0.96 (-1.46--0.47)                          | <b>3.62E-04</b>      |
| GM3 18:0   | 1.69 (0.59-2.79)                             | <b>8.07E-03</b>      | -0.75 (-1.28--0.23)                          | <b>9.08E-03</b>      |
| GM3 20:0   | 2.87 (1.83-3.92)                             | <b>1.43E-06</b>      | -0.79 (-1.29--0.28)                          | <b>4.46E-03</b>      |
| GM3 22:0   | 2.04 (0.93-3.16)                             | <b>1.51E-03</b>      | -0.94 (-1.46--0.41)                          | <b>1.12E-03</b>      |
| GM3 24:0   | 1.94 (0.83-3.05)                             | <b>2.44E-03</b>      | -2.29 (-2.78--1.79)                          | <b>1.17E-17</b>      |
| GM3 24:1   | 3.21 (2.18-4.24)                             | <b>3.46E-08</b>      | -1.68 (-2.16--1.20)                          | <b>1.28E-10</b>      |
| SM 31:1    | 2.55 (1.45-3.64)                             | <b>5.21E-05</b>      | 0.52 (-0.01-1.05)                            | 7.84E-02             |
| SM 32:1    | 2.42 (1.37-3.48)                             | <b>6.97E-05</b>      | 1.24 (0.74-1.73)                             | <b>5.44E-06</b>      |
| SM 32:2    | 3.44 (2.15-4.73)                             | <b>2.71E-06</b>      | 3.16 (2.59-3.72)                             | <b>1.75E-24</b>      |
| SM 33:1    | 3.35 (2.34-4.36)                             | <b>4.07E-09</b>      | 0.44 (-0.05-0.94)                            | 1.12E-01             |
| SM 34:1    | 4.46 (3.39-5.52)                             | <b>1.22E-13</b>      | -0.04 (-0.57-0.50)                           | 9.17E-01             |
| SM 34:2    | 4.76 (3.57-5.94)                             | <b>5.87E-13</b>      | 2.41 (1.85-2.97)                             | <b>1.65E-15</b>      |
| SM 34:3    | 2.19 (1.04-3.34)                             | <b>9.74E-04</b>      | 1.29 (0.75-1.82)                             | <b>1.14E-05</b>      |

| Lipids                | Age <sup>a</sup>                             |                      | Body Mass Index <sup>b</sup>                 |                      |
|-----------------------|----------------------------------------------|----------------------|----------------------------------------------|----------------------|
|                       | $\beta$ coefficient<br>(95% CI) <sup>c</sup> | p-value <sup>d</sup> | $\beta$ coefficient<br>(95% CI) <sup>e</sup> | p-value <sup>d</sup> |
| SM 35:1               | 2.55 (1.53-3.56)                             | <b>1.22E-05</b>      | 0.29 (-0.21-0.78)                            | 3.16E-01             |
| SM 35:2               | 1.52 (0.44-2.60)                             | <b>1.49E-02</b>      | 0.94 (0.43-1.45)                             | <b>6.96E-04</b>      |
| SM 36:1               | 1.17 (0.07-2.27)                             | 7.05E-02             | 1.90 (1.40-2.39)                             | <b>1.80E-12</b>      |
| SM 36:2               | 1.57 (0.42-2.72)                             | <b>1.79E-02</b>      | 1.95 (1.43-2.47)                             | <b>4.10E-12</b>      |
| SM 36:3               | 0.28 (-0.90-1.46)                            | 7.12E-01             | 1.22 (0.67-1.77)                             | <b>4.15E-05</b>      |
| SM 37:2               | 1.56 (0.43-2.69)                             | <b>1.74E-02</b>      | 1.11 (0.58-1.64)                             | <b>1.25E-04</b>      |
| SM 38:1               | 0.27 (-0.83-1.37)                            | 7.10E-01             | 0.41 (-0.11-0.93)                            | 1.60E-01             |
| SM 38:2               | 2.03 (0.86-3.20)                             | <b>2.66E-03</b>      | 0.61 (0.05-1.17)                             | <b>4.98E-02</b>      |
| SM 39:1               | 0.84 (-0.31-1.99)                            | 2.30E-01             | 0.30 (-0.24-0.85)                            | 3.42E-01             |
| SM 41:1               | 1.58 (0.51-2.64)                             | <b>1.04E-02</b>      | 0.84 (0.34-1.35)                             | <b>2.03E-03</b>      |
| SM 41:2               | 2.39 (1.36-3.41)                             | <b>5.21E-05</b>      | 0.01 (-0.48-0.51)                            | 9.66E-01             |
| SM 42:1               | 1.47 (0.41-2.53)                             | <b>1.67E-02</b>      | 0.26 (-0.25-0.76)                            | 3.82E-01             |
| PC 28:0               | 0.01 (-0.57-0.58)                            | 9.87E-01             | 0.08 (-0.19-0.35)                            | 6.10E-01             |
| PC 29:0               | 1.60 (0.56-2.65)                             | <b>8.15E-03</b>      | 0.27 (-0.23-0.77)                            | 3.50E-01             |
| PC 30:0               | 0.88 (-0.22-1.98)                            | 1.88E-01             | 0.82 (0.31-1.34)                             | <b>3.76E-03</b>      |
| PC 31:0               | 0.91 (-0.11-1.93)                            | 1.37E-01             | 0.52 (0.04-1.00)                             | 5.41E-02             |
| PC 32:0               | 2.09 (1.03-3.15)                             | <b>6.69E-04</b>      | 0.48 (-0.03-0.98)                            | 9.62E-02             |
| PC 33:0               | 1.42 (0.39-2.45)                             | <b>1.76E-02</b>      | -0.49 (-0.98-0.00)                           | 7.72E-02             |
| PC 33:1               | 0.84 (-0.24-1.91)                            | 1.99E-01             | 0.69 (0.18-1.20)                             | <b>1.41E-02</b>      |
| PC 33:2               | 1.20 (0.15-2.26)                             | 5.37E-02             | -0.67 (-1.17--0.17)                          | <b>1.49E-02</b>      |
| PC 33:3               | 1.18 (0.19-2.18)                             | <b>4.37E-02</b>      | -0.53 (-1.01--0.06)                          | <b>4.28E-02</b>      |
| PC 34:0               | 2.58 (1.52-3.64)                             | <b>2.40E-05</b>      | -0.25 (-0.77-0.26)                           | 3.94E-01             |
| PC 34:1               | 1.02 (-0.13-2.17)                            | 1.40E-01             | 0.67 (0.13-1.21)                             | <b>2.63E-02</b>      |
| PC 34:2               | -0.32 (-1.38-0.74)                           | 6.56E-01             | 0.08 (-0.42-0.58)                            | 7.91E-01             |
| PC 34:3               | 0.73 (-0.36-1.83)                            | 2.79E-01             | -0.05 (-0.57-0.47)                           | 8.90E-01             |
| PC 34:4               | 0.26 (-0.78-1.31)                            | 6.95E-01             | 0.45 (-0.04-0.94)                            | 1.04E-01             |
| PC 34:5               | 0.96 (0.03-1.89)                             | 8.01E-02             | 0.54 (0.10-0.98)                             | <b>2.86E-02</b>      |
| PC 35:0               | 1.33 (0.25-2.42)                             | <b>3.57E-02</b>      | -0.26 (-0.77-0.26)                           | 3.94E-01             |
| PC 35:2               | 0.85 (-0.24-1.94)                            | 1.94E-01             | -1.66 (-2.16--1.16)                          | <b>5.46E-10</b>      |
| PC 35:3               | 2.06 (1.04-3.07)                             | <b>4.25E-04</b>      | -0.70 (-1.18--0.21)                          | <b>9.08E-03</b>      |
| PC 35:4               | 0.78 (-0.23-1.80)                            | 2.01E-01             | 0.12 (-0.36-0.61)                            | 6.75E-01             |
| PC 35:5               | 1.26 (0.39-2.13)                             | <b>1.26E-02</b>      | 0.36 (-0.06-0.77)                            | 1.25E-01             |
| PC 36:2               | 1.00 (-0.04-2.05)                            | 1.07E-01             | 0.14 (-0.36-0.64)                            | 6.44E-01             |
| PC 36:3               | 0.78 (-0.26-1.81)                            | 2.14E-01             | 0.23 (-0.26-0.72)                            | 4.12E-01             |
| PC 36:4a <sup>f</sup> | 0.20 (-0.83-1.24)                            | 7.62E-01             | -1.61 (-2.08--1.15)                          | <b>1.89E-10</b>      |
| PC 36:4b <sup>f</sup> | 0.24 (-0.81-1.29)                            | 7.28E-01             | 1.14 (0.65-1.62)                             | <b>1.62E-05</b>      |
| PC 36:5               | 1.50 (0.52-2.49)                             | <b>8.37E-03</b>      | 0.85 (0.39-1.32)                             | <b>7.19E-04</b>      |
| PC 36:6               | 1.23 (0.25-2.20)                             | <b>3.10E-02</b>      | 0.18 (-0.29-0.64)                            | 5.17E-01             |
| PC 37:4               | 0.35 (-0.66-1.37)                            | 5.91E-01             | -0.54 (-1.02--0.06)                          | <b>4.39E-02</b>      |
| PC 37:5               | 1.84 (0.85-2.82)                             | <b>1.31E-03</b>      | 0.11 (-0.37-0.58)                            | 7.11E-01             |
| PC 37:6               | 1.85 (0.87-2.82)                             | <b>1.05E-03</b>      | -0.70 (-1.17--0.24)                          | <b>5.65E-03</b>      |
| PC 38:2               | 3.30 (2.28-4.32)                             | <b>1.10E-08</b>      | -0.37 (-0.87-0.13)                           | 1.85E-01             |
| PC 38:3               | 2.53 (1.41-3.65)                             | <b>8.88E-05</b>      | 2.12 (1.61-2.63)                             | <b>1.78E-14</b>      |
| PC 38:4               | 1.04 (0.01-2.08)                             | 8.68E-02             | 1.03 (0.54-1.51)                             | <b>8.87E-05</b>      |

| Lipids                | Age <sup>a</sup>                             |                      | Body Mass Index <sup>b</sup>                 |                      |
|-----------------------|----------------------------------------------|----------------------|----------------------------------------------|----------------------|
|                       | $\beta$ coefficient<br>(95% CI) <sup>c</sup> | p-value <sup>d</sup> | $\beta$ coefficient<br>(95% CI) <sup>e</sup> | p-value <sup>d</sup> |
| PC 38:5               | 1.72 (0.66-2.79)                             | <b>5.06E-03</b>      | -0.07 (-0.58-0.44)                           | 8.22E-01             |
| PC 38:6a <sup>f</sup> | 0.70 (-0.38-1.77)                            | 2.96E-01             | -0.68 (-1.19--0.17)                          | <b>1.49E-02</b>      |
| PC 38:6b <sup>f</sup> | 1.54 (0.55-2.52)                             | <b>6.83E-03</b>      | -0.14 (-0.61-0.33)                           | 6.29E-01             |
| PC 38:7               | 1.80 (0.80-2.80)                             | <b>1.84E-03</b>      | -0.74 (-1.21--0.26)                          | <b>4.75E-03</b>      |
| PC 39:6               | 2.05 (1.03-3.08)                             | <b>4.85E-04</b>      | -1.26 (-1.74--0.78)                          | <b>1.25E-06</b>      |
| PC 40:5               | 2.71 (1.64-3.79)                             | <b>9.76E-06</b>      | 0.96 (0.45-1.48)                             | <b>5.47E-04</b>      |
| PC 40:6               | 2.51 (1.50-3.52)                             | <b>1.51E-05</b>      | 0.92 (0.44-1.40)                             | <b>4.86E-04</b>      |
| PC 40:7               | 2.35 (1.28-3.41)                             | <b>1.20E-04</b>      | -1.22 (-1.72--0.72)                          | <b>7.64E-06</b>      |
| PC(O-30:0)            | -0.86 (-1.85-0.12)                           | 1.46E-01             | -0.15 (-0.61-0.32)                           | 6.05E-01             |
| PC(O-32:0)            | -1.21 (-2.27--0.15)                          | 5.33E-02             | -0.01 (-0.52-0.49)                           | 9.63E-01             |
| PC(O-32:1)            | -1.95 (-3.03--0.86)                          | <b>1.92E-03</b>      | 0.08 (-0.44-0.60)                            | 8.17E-01             |
| PC(O-32:2)            | -0.31 (-1.14-0.53)                           | 5.71E-01             | -0.24 (-0.63-0.16)                           | 3.02E-01             |
| PC(O-34:0)            | 0.30 (-0.77-1.38)                            | 6.67E-01             | -0.47 (-0.97-0.04)                           | 1.02E-01             |
| PC(O-34:1)            | 0.29 (-0.75-1.33)                            | 6.67E-01             | -1.08 (-1.57--0.60)                          | <b>3.76E-05</b>      |
| PC(O-34:2)            | -1.06 (-2.04--0.09)                          | 6.60E-02             | -0.84 (-1.30--0.39)                          | <b>7.00E-04</b>      |
| PC(O-34:4)            | -0.33 (-1.30-0.64)                           | 5.97E-01             | 0.16 (-0.30-0.62)                            | 5.54E-01             |
| PC(O-35:4)            | -0.98 (-1.88--0.07)                          | 6.93E-02             | 0.45 (0.02-0.88)                             | 6.05E-02             |
| PC(O-36:0)            | 0.52 (-0.37-1.41)                            | 3.45E-01             | -0.02 (-0.44-0.40)                           | 9.45E-01             |
| PC(O-36:1)            | 0.61 (-0.36-1.58)                            | 3.12E-01             | -0.72 (-1.18--0.26)                          | <b>4.24E-03</b>      |
| PC(O-36:2)            | -0.33 (-1.37-0.72)                           | 6.35E-01             | -1.66 (-2.14--1.19)                          | <b>8.76E-11</b>      |
| PC(O-36:3)            | -1.66 (-2.71--0.61)                          | <b>6.34E-03</b>      | -0.23 (-0.73-0.27)                           | 4.23E-01             |
| PC(O-36:4)            | -1.82 (-2.87--0.77)                          | <b>2.66E-03</b>      | 0.55 (0.05-1.05)                             | <b>4.99E-02</b>      |
| PC(O-36:5)            | -0.68 (-1.74-0.37)                           | 2.96E-01             | 0.93 (0.44-1.43)                             | <b>5.32E-04</b>      |
| PC(O-38:4)            | -1.09 (-2.10--0.08)                          | 6.84E-02             | -0.18 (-0.66-0.30)                           | 5.21E-01             |
| PC(O-38:5)            | -1.12 (-2.19--0.05)                          | 7.41E-02             | -0.17 (-0.67-0.34)                           | 5.86E-01             |
| PC(O-40:7)            | 1.05 (0.03-2.07)                             | 7.96E-02             | -0.08 (-0.56-0.41)                           | 8.04E-01             |
| PC(P-32:0)            | 0.84 (-0.18-1.85)                            | 1.72E-01             | 0.37 (-0.11-0.85)                            | 1.71E-01             |
| PC(P-32:1)            | 0.99 (0.00-1.98)                             | 8.87E-02             | 0.60 (0.13-1.07)                             | <b>2.02E-02</b>      |
| PC(P-34:1)            | 2.19 (1.14-3.23)                             | <b>2.88E-04</b>      | -0.95 (-1.45--0.46)                          | <b>4.23E-04</b>      |
| PC(P-34:2)            | -1.45 (-2.54--0.36)                          | <b>2.18E-02</b>      | -0.96 (-1.47--0.44)                          | <b>6.08E-04</b>      |
| PC(P-36:2)            | -0.23 (-1.34-0.88)                           | 7.56E-01             | -1.57 (-2.08--1.06)                          | <b>1.17E-08</b>      |
| PC(P-36:5)            | -0.09 (-0.88-0.71)                           | 8.55E-01             | 0.70 (0.32-1.07)                             | <b>5.63E-04</b>      |
| PC(P-38:5)            | -0.87 (-1.90-0.17)                           | 1.64E-01             | 0.64 (0.15-1.13)                             | <b>1.79E-02</b>      |
| PC(P-40:5)            | 0.64 (-0.39-1.67)                            | 3.15E-01             | -0.50 (-0.98--0.01)                          | 6.75E-02             |
| LPC 14:0              | 0.32 (-0.66-1.29)                            | 6.22E-01             | 0.11 (-0.35-0.57)                            | 6.95E-01             |
| LPC 15:0              | 1.81 (0.79-2.84)                             | <b>2.26E-03</b>      | -1.35 (-1.83--0.87)                          | <b>2.09E-07</b>      |
| LPC 16:0              | 0.75 (-0.20-1.71)                            | 1.91E-01             | -0.60 (-1.05--0.15)                          | <b>1.62E-02</b>      |
| LPC 16:1              | 0.36 (-0.49-1.20)                            | 5.10E-01             | -0.26 (-0.66-0.14)                           | 2.53E-01             |
| LPC 17:0              | 1.79 (0.72-2.87)                             | <b>3.85E-03</b>      | -1.68 (-2.17--1.19)                          | <b>2.23E-10</b>      |
| LPC 17:1              | 1.16 (0.12-2.20)                             | 6.02E-02             | -1.64 (-2.12--1.17)                          | <b>1.45E-10</b>      |
| LPC 18:0              | 2.95 (1.86-4.05)                             | <b>2.10E-06</b>      | -1.03 (-1.55--0.50)                          | <b>3.23E-04</b>      |
| LPC 18:1              | 0.46 (-0.69-1.61)                            | 5.33E-01             | -1.79 (-2.31--1.27)                          | <b>1.93E-10</b>      |
| LPC 18:2              | -1.87 (-2.94--0.80)                          | <b>2.59E-03</b>      | -2.65 (-3.11--2.19)                          | <b>1.05E-25</b>      |
| LPC 18:3              | -0.45 (-1.37-0.48)                           | 4.42E-01             | -1.01 (-1.44--0.58)                          | <b>1.38E-05</b>      |

| Lipids      | Age <sup>a</sup>                             |                      | Body Mass Index <sup>b</sup>                 |                      |
|-------------|----------------------------------------------|----------------------|----------------------------------------------|----------------------|
|             | $\beta$ coefficient<br>(95% CI) <sup>c</sup> | p-value <sup>d</sup> | $\beta$ coefficient<br>(95% CI) <sup>e</sup> | p-value <sup>d</sup> |
| LPC 20:0    | 3.17 (2.16-4.17)                             | <b>2.78E-08</b>      | -2.41 (-2.85--1.96)                          | <b>4.91E-23</b>      |
| LPC 20:1    | 3.49 (2.53-4.46)                             | <b>8.91E-11</b>      | -2.35 (-2.78--1.92)                          | <b>2.33E-23</b>      |
| LPC 20:2    | 1.43 (0.50-2.35)                             | <b>7.96E-03</b>      | -1.65 (-2.07--1.23)                          | <b>4.83E-13</b>      |
| LPC 20:3    | -0.11 (-1.16-0.93)                           | 8.55E-01             | -0.21 (-0.70-0.28)                           | 4.71E-01             |
| LPC 20:4    | -0.58 (-1.69-0.53)                           | 4.06E-01             | -1.03 (-1.55--0.51)                          | <b>2.49E-04</b>      |
| LPC 20:5    | 0.47 (-0.41-1.35)                            | 3.99E-01             | -0.14 (-0.56-0.27)                           | 5.66E-01             |
| LPC 22:0    | 2.73 (1.74-3.71)                             | <b>1.42E-06</b>      | -1.95 (-2.41--1.50)                          | <b>1.51E-15</b>      |
| LPC 22:1    | 1.54 (0.79-2.29)                             | <b>3.78E-04</b>      | -1.33 (-1.67--0.98)                          | <b>1.00E-12</b>      |
| LPC 22:6    | 0.25 (-0.73-1.24)                            | 6.94E-01             | -1.11 (-1.57--0.65)                          | <b>7.60E-06</b>      |
| LPC 24:0    | 3.81 (2.77-4.85)                             | <b>7.12E-11</b>      | -1.85 (-2.34--1.36)                          | <b>3.82E-12</b>      |
| LPC 26:0    | 2.23 (1.22-3.25)                             | <b>1.29E-04</b>      | -1.81 (-2.27--1.34)                          | <b>8.52E-13</b>      |
| LPC(O-20:0) | 0.33 (-0.82-1.48)                            | 6.67E-01             | -2.48 (-2.98--1.98)                          | <b>6.39E-20</b>      |
| LPC(O-22:0) | 1.35 (0.27-2.42)                             | <b>3.25E-02</b>      | -1.85 (-2.34--1.36)                          | <b>2.36E-12</b>      |
| LPC(O-22:1) | -0.53 (-1.62-0.57)                           | 4.44E-01             | -2.36 (-2.84--1.88)                          | <b>1.24E-19</b>      |
| LPC(O-24:0) | 2.76 (1.75-3.77)                             | <b>1.49E-06</b>      | -1.36 (-1.84--0.89)                          | <b>1.19E-07</b>      |
| LPC(O-24:1) | 0.63 (-0.36-1.62)                            | 3.05E-01             | -1.05 (-1.51--0.59)                          | <b>2.79E-05</b>      |
| LPC(O-24:2) | -0.09 (-1.17-0.99)                           | 8.87E-01             | -2.40 (-2.87--1.94)                          | <b>2.86E-21</b>      |
| PE 32:1     | 0.05 (-0.67-0.77)                            | 9.03E-01             | 0.81 (0.47-1.14)                             | <b>8.40E-06</b>      |
| PE 34:1     | 0.58 (-0.37-1.54)                            | 3.27E-01             | 0.90 (0.45-1.35)                             | <b>2.32E-04</b>      |
| PE 34:2     | 1.41 (0.38-2.45)                             | <b>1.80E-02</b>      | 0.57 (0.08-1.06)                             | <b>3.68E-02</b>      |
| PE 34:3     | 0.98 (0.05-1.90)                             | 7.23E-02             | 0.35 (-0.08-0.79)                            | 1.54E-01             |
| PE 35:1     | 1.12 (0.09-2.14)                             | 6.58E-02             | 0.26 (-0.23-0.74)                            | 3.58E-01             |
| PE 35:2     | 1.74 (0.80-2.68)                             | <b>1.41E-03</b>      | -0.25 (-0.70-0.21)                           | 3.50E-01             |
| PE 36:1     | 0.51 (-0.54-1.56)                            | 4.44E-01             | 1.09 (0.60-1.58)                             | <b>4.03E-05</b>      |
| PE 36:2     | 1.21 (0.14-2.27)                             | 5.49E-02             | 0.59 (0.09-1.10)                             | <b>3.44E-02</b>      |
| PE 36:3     | 0.81 (-0.16-1.78)                            | 1.64E-01             | -0.22 (-0.68-0.24)                           | 4.05E-01             |
| PE 36:4     | 1.27 (0.24-2.29)                             | <b>3.48E-02</b>      | 0.70 (0.22-1.19)                             | <b>8.45E-03</b>      |
| PE 36:5     | 1.13 (0.16-2.09)                             | <b>4.74E-02</b>      | 0.62 (0.16-1.07)                             | <b>1.41E-02</b>      |
| PE 38:3     | 2.16 (1.03-3.29)                             | <b>9.73E-04</b>      | 0.95 (0.41-1.49)                             | <b>1.12E-03</b>      |
| PE 38:4     | 1.59 (0.48-2.71)                             | <b>1.38E-02</b>      | 0.58 (0.05-1.11)                             | <b>4.99E-02</b>      |
| PE 38:5     | 1.41 (0.38-2.44)                             | <b>1.76E-02</b>      | -0.05 (-0.54-0.44)                           | 8.85E-01             |
| PE 38:6     | 1.67 (0.70-2.63)                             | <b>2.66E-03</b>      | 0.19 (-0.27-0.66)                            | 4.71E-01             |
| PE 40:5     | 0.83 (0.00-1.66)                             | 9.11E-02             | 0.51 (0.12-0.90)                             | <b>1.94E-02</b>      |
| PE 40:6     | 1.63 (0.60-2.65)                             | <b>6.15E-03</b>      | 0.86 (0.37-1.34)                             | <b>1.12E-03</b>      |
| PE 40:7     | 1.24 (0.38-2.09)                             | <b>1.26E-02</b>      | -0.25 (-0.66-0.16)                           | 2.91E-01             |
| PE(O-34:1)  | 0.90 (-0.09-1.89)                            | 1.29E-01             | -0.56 (-1.03--0.09)                          | <b>3.08E-02</b>      |
| PE(O-34:2)  | 0.26 (-0.68-1.21)                            | 6.67E-01             | -0.53 (-0.97--0.08)                          | <b>3.32E-02</b>      |
| PE(O-36:2)  | 1.09 (0.06-2.11)                             | 7.10E-02             | -0.67 (-1.15--0.19)                          | <b>1.22E-02</b>      |
| PE(O-36:3)  | 0.18 (-0.85-1.20)                            | 7.94E-01             | -0.31 (-0.80-0.17)                           | 2.59E-01             |
| PE(O-36:4)  | -0.28 (-1.26-0.71)                           | 6.67E-01             | 0.32 (-0.14-0.79)                            | 2.21E-01             |
| PE(O-36:5)  | 0.39 (-0.36-1.14)                            | 4.13E-01             | 0.07 (-0.29-0.42)                            | 7.58E-01             |
| PE(O-38:4)  | 0.81 (-0.12-1.74)                            | 1.47E-01             | 0.35 (-0.09-0.79)                            | 1.60E-01             |
| PE(O-38:5)  | 0.38 (-0.59-1.35)                            | 5.41E-01             | 0.09 (-0.37-0.55)                            | 7.62E-01             |
| PE(O-38:6)  | -0.28 (-1.28-0.72)                           | 6.67E-01             | 0.31 (-0.17-0.78)                            | 2.59E-01             |

| Lipids     | Age <sup>a</sup>                             |                      | Body Mass Index <sup>b</sup>                 |                      |
|------------|----------------------------------------------|----------------------|----------------------------------------------|----------------------|
|            | $\beta$ coefficient<br>(95% CI) <sup>c</sup> | p-value <sup>d</sup> | $\beta$ coefficient<br>(95% CI) <sup>e</sup> | p-value <sup>d</sup> |
| PE(O-40:5) | 1.12 (0.10-2.14)                             | 6.47E-02             | -0.27 (-0.76-0.22)                           | 3.40E-01             |
| PE(O-40:6) | 0.85 (-0.23-1.93)                            | 1.90E-01             | -0.54 (-1.05--0.04)                          | 5.54E-02             |
| PE(O-40:7) | 0.37 (-0.60-1.34)                            | 5.53E-01             | -0.54 (-1.00--0.09)                          | <b>3.19E-02</b>      |
| PE(P-34:1) | 0.47 (-0.56-1.50)                            | 4.73E-01             | 0.32 (-0.16-0.81)                            | 2.48E-01             |
| PE(P-34:2) | 0.43 (-0.61-1.47)                            | 5.26E-01             | 0.22 (-0.27-0.71)                            | 4.40E-01             |
| PE(P-36:4) | -0.22 (-1.28-0.84)                           | 7.56E-01             | 1.18 (0.69-1.68)                             | <b>9.92E-06</b>      |
| PE(P-38:6) | 0.37 (-0.66-1.39)                            | 5.82E-01             | 0.43 (-0.05-0.92)                            | 1.11E-01             |
| PE(P-36:1) | 0.97 (-0.03-1.96)                            | 1.02E-01             | 0.05 (-0.42-0.52)                            | 8.76E-01             |
| PE(P-36:2) | 0.47 (-0.51-1.44)                            | 4.44E-01             | -0.39 (-0.85-0.07)                           | 1.27E-01             |
| PE(P-38:4) | -0.19 (-1.24-0.87)                           | 7.88E-01             | 0.67 (0.18-1.17)                             | <b>1.42E-02</b>      |
| PE(P-40:5) | 0.89 (-0.22-1.99)                            | 1.83E-01             | -0.50 (-1.02-0.02)                           | 8.78E-02             |
| PE(P-40:6) | 0.49 (-0.48-1.46)                            | 4.27E-01             | -0.22 (-0.68-0.24)                           | 4.06E-01             |
| LPE 16:0   | 2.05 (1.12-2.98)                             | <b>1.20E-04</b>      | -0.96 (-1.40--0.52)                          | <b>5.45E-05</b>      |
| LPE 18:0   | 2.86 (1.85-3.86)                             | <b>6.08E-07</b>      | -1.04 (-1.52--0.55)                          | <b>7.49E-05</b>      |
| LPE 18:1   | 0.13 (-0.75-1.01)                            | 8.15E-01             | -0.99 (-1.39--0.58)                          | <b>8.19E-06</b>      |
| LPE 18:2   | 1.65 (0.75-2.55)                             | <b>1.56E-03</b>      | -0.76 (-1.18--0.33)                          | <b>1.18E-03</b>      |
| LPE 20:4   | 0.27 (-0.76-1.30)                            | 6.87E-01             | -0.58 (-1.07--0.10)                          | <b>2.95E-02</b>      |
| LPE 22:6   | 1.36 (0.38-2.34)                             | <b>1.65E-02</b>      | -0.87 (-1.33--0.41)                          | <b>5.15E-04</b>      |
| PI 32:0    | -1.12 (-1.92--0.33)                          | <b>1.49E-02</b>      | 1.10 (0.73-1.47)                             | <b>3.08E-08</b>      |
| PI 32:1    | -0.32 (-1.12-0.48)                           | 5.33E-01             | 1.29 (0.93-1.65)                             | <b>3.43E-11</b>      |
| PI 34:0    | -1.35 (-2.08--0.63)                          | <b>1.31E-03</b>      | 0.58 (0.24-0.93)                             | <b>2.00E-03</b>      |
| PI 34:1    | -0.12 (-1.03-0.80)                           | 8.44E-01             | 1.10 (0.68-1.52)                             | <b>1.66E-06</b>      |
| PI 36:0    | -0.64 (-1.61-0.34)                           | 2.93E-01             | 0.83 (0.37-1.28)                             | <b>8.78E-04</b>      |
| PI 36:1    | 0.13 (-0.79-1.04)                            | 8.26E-01             | 0.23 (-0.20-0.66)                            | 3.61E-01             |
| PI 36:2    | 0.77 (-0.24-1.78)                            | 2.09E-01             | -0.19 (-0.67-0.29)                           | 5.07E-01             |
| PI 36:3    | 1.53 (0.57-2.49)                             | <b>5.92E-03</b>      | -0.36 (-0.82-0.09)                           | 1.60E-01             |
| PI 36:4    | 2.29 (1.26-3.32)                             | <b>1.15E-04</b>      | 1.30 (0.81-1.78)                             | <b>8.25E-07</b>      |
| PI 38:2    | 1.59 (0.71-2.47)                             | <b>1.70E-03</b>      | -0.50 (-0.92--0.08)                          | <b>3.07E-02</b>      |
| PI 38:3    | 2.90 (1.89-3.91)                             | <b>5.18E-07</b>      | 0.47 (-0.02-0.96)                            | 8.78E-02             |
| PI 38:4    | 3.39 (2.29-4.48)                             | <b>3.75E-08</b>      | 0.49 (-0.04-1.03)                            | 1.00E-01             |
| PI 38:5    | 2.15 (1.20-3.10)                             | <b>8.77E-05</b>      | -0.02 (-0.48-0.44)                           | 9.45E-01             |
| PI 38:6    | 1.23 (0.23-2.22)                             | <b>3.48E-02</b>      | -0.08 (-0.55-0.39)                           | 7.91E-01             |
| PI 40:4    | 1.90 (0.86-2.93)                             | <b>1.51E-03</b>      | 0.56 (0.07-1.05)                             | <b>4.11E-02</b>      |
| PI 40:5    | 1.67 (0.64-2.69)                             | <b>4.89E-03</b>      | 1.11 (0.63-1.59)                             | <b>1.82E-05</b>      |
| PI 40:6    | 0.60 (-0.38-1.58)                            | 3.23E-01             | 0.10 (-0.37-0.56)                            | 7.40E-01             |
| PS 36:1    | -0.24 (-1.11-0.63)                           | 6.70E-01             | 0.13 (-0.29-0.54)                            | 6.09E-01             |
| PS 36:2    | -0.75 (-1.69-0.19)                           | 1.88E-01             | -0.01 (-0.45-0.44)                           | 9.76E-01             |
| PS 38:3    | -0.72 (-1.53-0.08)                           | 1.36E-01             | 0.01 (-0.37-0.40)                            | 9.60E-01             |
| PS 38:4    | -0.32 (-1.16-0.52)                           | 5.58E-01             | -0.28 (-0.68-0.11)                           | 2.09E-01             |
| PS 38:5    | -0.78 (-1.69-0.12)                           | 1.48E-01             | -0.32 (-0.75-0.11)                           | 1.83E-01             |
| PS 40:5    | 0.23 (-0.55-1.01)                            | 6.56E-01             | -0.03 (-0.40-0.34)                           | 8.89E-01             |
| PS 40:6    | -0.61 (-1.48-0.27)                           | 2.59E-01             | -0.01 (-0.43-0.40)                           | 9.61E-01             |
| PG 34:1    | 1.27 (0.29-2.26)                             | <b>2.64E-02</b>      | 0.10 (-0.37-0.57)                            | 7.41E-01             |
| PG 34:2    | 0.13 (-0.79-1.05)                            | 8.31E-01             | 0.40 (-0.04-0.83)                            | 1.04E-01             |



| Lipids       | Age <sup>a</sup>                             |                      | Body Mass Index <sup>b</sup>                 |                      |
|--------------|----------------------------------------------|----------------------|----------------------------------------------|----------------------|
|              | $\beta$ coefficient<br>(95% CI) <sup>c</sup> | p-value <sup>d</sup> | $\beta$ coefficient<br>(95% CI) <sup>e</sup> | p-value <sup>d</sup> |
| PG 36:1      | 1.03 (0.08-1.99)                             | 6.84E-02             | 1.06 (0.61-1.51)                             | <b>1.23E-05</b>      |
| PG 36:2      | 1.11 (0.07-2.15)                             | 7.05E-02             | 0.93 (0.45-1.42)                             | <b>4.59E-04</b>      |
| CE 14:0      | 0.92 (-0.01-1.85)                            | 9.31E-02             | 1.10 (0.67-1.53)                             | <b>2.68E-06</b>      |
| CE 15:0      | 1.58 (0.63-2.52)                             | <b>3.97E-03</b>      | 0.85 (0.41-1.30)                             | <b>4.59E-04</b>      |
| CE 16:0      | 1.89 (0.89-2.90)                             | <b>1.19E-03</b>      | 1.21 (0.74-1.68)                             | <b>2.40E-06</b>      |
| CE 16:1      | 0.47 (-0.46-1.39)                            | 4.30E-01             | 1.51 (1.09-1.93)                             | <b>3.23E-11</b>      |
| CE 16:2      | 1.51 (0.48-2.54)                             | <b>1.13E-02</b>      | 1.51 (1.04-1.99)                             | <b>3.39E-09</b>      |
| CE 17:0      | 0.90 (-0.05-1.86)                            | 1.11E-01             | 0.03 (-0.42-0.49)                            | 9.06E-01             |
| CE 17:1      | 1.16 (0.11-2.22)                             | 6.31E-02             | 0.90 (0.41-1.40)                             | <b>7.96E-04</b>      |
| CE 18:0      | 1.57 (0.52-2.62)                             | <b>9.82E-03</b>      | 0.72 (0.23-1.22)                             | <b>8.19E-03</b>      |
| CE 18:1      | 1.70 (0.66-2.75)                             | <b>4.87E-03</b>      | 0.97 (0.47-1.46)                             | <b>3.18E-04</b>      |
| CE 18:2      | 0.96 (0.03-1.88)                             | 8.02E-02             | 1.02 (0.59-1.45)                             | <b>1.41E-05</b>      |
| CE 18:3      | 1.07 (0.07-2.07)                             | 6.93E-02             | 1.34 (0.88-1.80)                             | <b>8.26E-08</b>      |
| CE 20:1      | 1.16 (0.19-2.13)                             | <b>4.26E-02</b>      | -1.13 (-1.58--0.68)                          | <b>4.65E-06</b>      |
| CE 20:2      | 2.61 (1.63-3.58)                             | <b>2.71E-06</b>      | 0.41 (-0.07-0.88)                            | 1.27E-01             |
| CE 20:3      | 1.54 (0.45-2.64)                             | <b>1.50E-02</b>      | 2.50 (2.02-2.97)                             | <b>4.75E-22</b>      |
| CE 20:4      | 1.26 (0.31-2.21)                             | <b>2.18E-02</b>      | 1.26 (0.82-1.70)                             | <b>1.09E-07</b>      |
| CE 20:5      | 1.64 (0.79-2.48)                             | <b>8.47E-04</b>      | 1.03 (0.63-1.43)                             | <b>1.76E-06</b>      |
| CE 22:0      | 1.25 (0.41-2.09)                             | <b>1.05E-02</b>      | 0.41 (0.01-0.81)                             | 6.58E-02             |
| CE 22:1      | 1.68 (0.85-2.50)                             | <b>4.19E-04</b>      | -0.36 (-0.76-0.03)                           | 1.02E-01             |
| CE 22:4      | 0.89 (-0.23-2.02)                            | 1.88E-01             | 1.22 (0.70-1.75)                             | <b>1.65E-05</b>      |
| CE 22:5      | 1.69 (0.61-2.78)                             | <b>6.94E-03</b>      | 1.28 (0.77-1.79)                             | <b>3.49E-06</b>      |
| CE 22:6      | 1.98 (1.03-2.93)                             | <b>3.15E-04</b>      | 0.81 (0.36-1.26)                             | <b>9.56E-04</b>      |
| CE 24:0      | 1.31 (0.44-2.19)                             | <b>9.62E-03</b>      | 0.38 (-0.03-0.80)                            | 1.02E-01             |
| CE 24:1      | 2.02 (1.11-2.93)                             | <b>1.14E-04</b>      | 0.12 (-0.32-0.56)                            | 6.58E-01             |
| CE 24:4      | -0.08 (-1.01-0.84)                           | 8.83E-01             | -0.79 (-1.23--0.36)                          | <b>7.43E-04</b>      |
| CE 24:5      | -0.56 (-1.51-0.39)                           | 3.39E-01             | 0.19 (-0.26-0.64)                            | 4.71E-01             |
| CE 24:6      | 0.33 (-0.59-1.24)                            | 5.84E-01             | 0.24 (-0.19-0.67)                            | 3.43E-01             |
| COH          | 2.79 (1.76-3.82)                             | <b>1.84E-06</b>      | 0.52 (0.02-1.01)                             | 6.35E-02             |
| DG 14:0/16:0 | -0.08 (-0.77-0.62)                           | 8.55E-01             | 0.77 (0.45-1.10)                             | <b>1.08E-05</b>      |
| DG 14:0/18:1 | 0.42 (-0.42-1.26)                            | 4.30E-01             | 0.82 (0.42-1.21)                             | <b>1.31E-04</b>      |
| DG 16:0/16:0 | -0.09 (-0.84-0.66)                           | 8.44E-01             | 1.24 (0.90-1.58)                             | <b>1.24E-11</b>      |
| DG 16:0/18:0 | -0.16 (-0.95-0.63)                           | 7.56E-01             | 1.07 (0.71-1.43)                             | <b>4.82E-08</b>      |
| DG 16:0/18:1 | 0.56 (-0.36-1.49)                            | 3.28E-01             | 1.47 (1.05-1.89)                             | <b>8.42E-11</b>      |
| DG 16:0/18:2 | 0.71 (-0.24-1.65)                            | 2.14E-01             | 1.01 (0.58-1.45)                             | <b>1.93E-05</b>      |
| DG 16:0/20:3 | 0.61 (-0.31-1.53)                            | 2.90E-01             | 1.32 (0.90-1.74)                             | <b>7.59E-09</b>      |
| DG 16:0/20:4 | 0.24 (-0.57-1.05)                            | 6.57E-01             | 1.18 (0.80-1.55)                             | <b>4.49E-09</b>      |
| DG 16:0/22:5 | 0.59 (-0.32-1.50)                            | 2.96E-01             | 0.95 (0.52-1.37)                             | <b>3.81E-05</b>      |
| DG 16:0/22:6 | 0.54 (-0.25-1.34)                            | 2.69E-01             | 0.71 (0.34-1.08)                             | <b>4.76E-04</b>      |
| DG 16:1/18:0 | 0.03 (-0.71-0.77)                            | 9.42E-01             | 1.07 (0.73-1.41)                             | <b>4.94E-09</b>      |
| DG 16:1/18:1 | 0.74 (-0.16-1.64)                            | 1.75E-01             | 1.32 (0.91-1.74)                             | <b>3.01E-09</b>      |
| DG 18:0/18:1 | 0.39 (-0.39-1.17)                            | 4.30E-01             | 0.91 (0.55-1.27)                             | <b>4.04E-06</b>      |
| DG 18:0/18:2 | 0.47 (-0.34-1.29)                            | 3.51E-01             | 0.62 (0.23-1.00)                             | <b>3.44E-03</b>      |
| DG 18:0/20:4 | 0.75 (-0.16-1.65)                            | 1.74E-01             | 0.87 (0.44-1.29)                             | <b>1.83E-04</b>      |

| Lipids            | Age <sup>a</sup>                             |                      | Body Mass Index <sup>b</sup>                 |                      |
|-------------------|----------------------------------------------|----------------------|----------------------------------------------|----------------------|
|                   | $\beta$ coefficient<br>(95% CI) <sup>c</sup> | p-value <sup>d</sup> | $\beta$ coefficient<br>(95% CI) <sup>e</sup> | p-value <sup>d</sup> |
| DG 18:1/18:1      | 1.27 (0.38-2.16)                             | <b>1.40E-02</b>      | 0.93 (0.51-1.35)                             | <b>4.02E-05</b>      |
| DG 18:1/18:2      | 1.32 (0.38-2.26)                             | <b>1.59E-02</b>      | 0.40 (-0.05-0.85)                            | 1.12E-01             |
| DG 18:1/18:3      | 1.17 (0.35-1.98)                             | <b>1.38E-02</b>      | 0.23 (-0.16-0.62)                            | 3.11E-01             |
| DG 18:1/20:3      | 1.05 (0.20-1.90)                             | <b>3.50E-02</b>      | 0.57 (0.16-0.97)                             | <b>1.07E-02</b>      |
| DG 18:1/20:4      | 0.93 (0.05-1.81)                             | 7.40E-02             | 0.98 (0.57-1.39)                             | <b>1.08E-05</b>      |
| DG 18:2/18:2      | 0.95 (0.14-1.76)                             | <b>4.74E-02</b>      | -0.21 (-0.60-0.18)                           | 3.50E-01             |
| TG 14:0/16:0/18:1 | 0.32 (-0.58-1.23)                            | 5.82E-01             | 1.23 (0.81-1.65)                             | <b>4.82E-08</b>      |
| TG 14:0/16:0/18:2 | 0.07 (-0.76-0.91)                            | 8.83E-01             | 1.15 (0.77-1.53)                             | <b>3.07E-08</b>      |
| TG 14:0/16:1/18:1 | 0.67 (-0.11-1.45)                            | 1.54E-01             | 0.76 (0.39-1.12)                             | <b>1.39E-04</b>      |
| TG 14:0/16:1/18:2 | 0.70 (-0.02-1.43)                            | 1.02E-01             | 0.47 (0.13-0.82)                             | <b>1.24E-02</b>      |
| TG 14:0/17:0/18:1 | 0.44 (-0.45-1.34)                            | 4.30E-01             | 1.10 (0.69-1.52)                             | <b>8.43E-07</b>      |
| TG 14:0/18:0/18:1 | 0.10 (-0.74-0.94)                            | 8.47E-01             | 0.87 (0.48-1.26)                             | <b>3.81E-05</b>      |
| TG 14:0/18:2/18:2 | 1.25 (0.45-2.04)                             | <b>6.81E-03</b>      | 0.01 (-0.38-0.39)                            | 9.78E-01             |
| TG 14:1/16:0/18:1 | 0.17 (-0.65-0.99)                            | 7.56E-01             | 1.04 (0.66-1.42)                             | <b>3.94E-07</b>      |
| TG 14:1/16:1/18:0 | 0.03 (-0.65-0.70)                            | 9.48E-01             | 0.94 (0.63-1.25)                             | <b>1.64E-08</b>      |
| TG 14:1/18:0/18:2 | 1.02 (0.19-1.86)                             | <b>3.50E-02</b>      | 0.71 (0.32-1.10)                             | <b>8.07E-04</b>      |
| TG 14:1/18:1/18:1 | 1.58 (0.63-2.52)                             | <b>3.85E-03</b>      | 0.83 (0.38-1.28)                             | <b>6.31E-04</b>      |
| TG 15:0/16:0/18:1 | 0.31 (-0.59-1.20)                            | 5.98E-01             | 1.24 (0.83-1.66)                             | <b>2.38E-08</b>      |
| TG 15:0/18:1/18:1 | 1.64 (0.74-2.53)                             | <b>1.51E-03</b>      | 0.66 (0.23-1.08)                             | <b>4.91E-03</b>      |
| TG 16:0/16:0/16:0 | -0.43 (-1.15-0.29)                           | 3.38E-01             | 1.22 (0.90-1.54)                             | <b>3.58E-12</b>      |
| TG 16:0/16:0/18:0 | -0.42 (-1.16-0.32)                           | 3.63E-01             | 1.07 (0.73-1.40)                             | <b>5.30E-09</b>      |
| TG 16:0/16:0/18:1 | 0.15 (-0.82-1.13)                            | 8.10E-01             | 2.02 (1.60-2.45)                             | <b>2.85E-18</b>      |
| TG 16:0/16:0/18:2 | 0.18 (-0.82-1.19)                            | 7.82E-01             | 1.82 (1.37-2.27)                             | <b>8.15E-14</b>      |
| TG 16:0/16:1/17:0 | 0.15 (-0.75-1.05)                            | 7.96E-01             | 1.52 (1.11-1.92)                             | <b>4.10E-12</b>      |
| TG 16:0/16:1/18:1 | 1.01 (0.07-1.96)                             | 6.86E-02             | 1.63 (1.21-2.06)                             | <b>1.55E-12</b>      |
| TG 16:0/17:0/18:0 | -0.30 (-0.97-0.36)                           | 4.73E-01             | 0.66 (0.35-0.97)                             | <b>8.07E-05</b>      |
| TG 16:0/17:0/18:1 | 0.40 (-0.49-1.29)                            | 4.73E-01             | 1.39 (0.99-1.79)                             | <b>1.71E-10</b>      |
| TG 16:0/17:0/18:2 | 0.83 (-0.13-1.79)                            | 1.48E-01             | 1.72 (1.29-2.15)                             | <b>2.73E-13</b>      |
| TG 16:0/18:0/18:1 | -0.05 (-0.85-0.74)                           | 9.12E-01             | 1.28 (0.92-1.64)                             | <b>4.87E-11</b>      |
| TG 16:0/18:1/18:1 | 1.59 (0.59-2.60)                             | <b>6.28E-03</b>      | 1.77 (1.31-2.22)                             | <b>9.38E-13</b>      |
| TG 16:0/18:1/18:2 | 1.66 (0.67-2.65)                             | <b>3.85E-03</b>      | 0.99 (0.53-1.46)                             | <b>8.64E-05</b>      |
| TG 16:0/18:2/18:2 | 1.31 (0.40-2.22)                             | <b>1.29E-02</b>      | 0.34 (-0.09-0.77)                            | 1.66E-01             |
| TG 16:1/16:1/16:1 | 0.49 (-0.28-1.27)                            | 3.05E-01             | 0.85 (0.49-1.21)                             | <b>1.41E-05</b>      |
| TG 16:1/16:1/18:0 | 0.00 (-0.82-0.82)                            | 9.96E-01             | 0.85 (0.47-1.24)                             | <b>4.02E-05</b>      |
| TG 16:1/16:1/18:1 | 0.97 (0.04-1.90)                             | 7.46E-02             | 1.58 (1.16-2.00)                             | <b>3.82E-12</b>      |
| TG 16:1/17:0/18:1 | 1.37 (0.44-2.31)                             | <b>1.14E-02</b>      | 1.24 (0.81-1.68)                             | <b>1.19E-07</b>      |
| TG 16:1/18:1/18:1 | 2.26 (1.30-3.22)                             | <b>4.57E-05</b>      | 1.11 (0.65-1.56)                             | <b>7.26E-06</b>      |
| TG 16:1/18:1/18:2 | 1.96 (1.01-2.91)                             | <b>3.27E-04</b>      | 0.61 (0.16-1.07)                             | <b>1.40E-02</b>      |
| TG 17:0/18:1/18:1 | 0.74 (-0.09-1.57)                            | 1.39E-01             | 0.95 (0.57-1.34)                             | <b>5.44E-06</b>      |
| TG 18:0/18:0/18:1 | -0.08 (-0.59-0.43)                           | 8.10E-01             | 0.47 (0.23-0.70)                             | <b>2.97E-04</b>      |
| TG 18:0/18:1/18:1 | 0.40 (-0.33-1.14)                            | 3.82E-01             | 0.92 (0.58-1.26)                             | <b>7.43E-07</b>      |
| TG 18:0/18:2/18:2 | 1.19 (0.54-1.83)                             | <b>1.48E-03</b>      | 0.23 (-0.08-0.54)                            | 1.83E-01             |
| TG 18:1/18:1/18:1 | 1.61 (0.83-2.39)                             | <b>3.30E-04</b>      | 0.70 (0.33-1.07)                             | <b>5.47E-04</b>      |
| TG 18:1/18:1/18:2 | 1.43 (0.55-2.31)                             | <b>5.02E-03</b>      | 0.17 (-0.25-0.59)                            | 4.99E-01             |

| Lipids            | Age <sup>a</sup>                             |                      | Body Mass Index <sup>b</sup>                 |                      |
|-------------------|----------------------------------------------|----------------------|----------------------------------------------|----------------------|
|                   | $\beta$ coefficient<br>(95% CI) <sup>c</sup> | p-value <sup>d</sup> | $\beta$ coefficient<br>(95% CI) <sup>e</sup> | p-value <sup>d</sup> |
| TG 18:1/18:1/20:4 | 1.84 (0.85-2.83)                             | <b>1.33E-03</b>      | 1.15 (0.68-1.61)                             | <b>5.55E-06</b>      |
| TG 18:1/18:1/22:6 | 1.70 (0.74-2.66)                             | <b>2.17E-03</b>      | 1.18 (0.73-1.62)                             | <b>1.36E-06</b>      |
| TG 18:1/18:2/18:2 | 1.62 (0.82-2.42)                             | <b>4.34E-04</b>      | -0.20 (-0.59-0.18)                           | 3.65E-01             |
| TG 18:2/18:2/18:2 | 1.11 (0.40-1.81)                             | <b>6.77E-03</b>      | -0.41 (-0.74--0.07)                          | <b>2.90E-02</b>      |
| TG 18:2/18:2/20:4 | 0.30 (-0.22-0.82)                            | 3.51E-01             | 0.02 (-0.23-0.27)                            | 9.06E-01             |

<sup>a</sup> units = years

<sup>b</sup> units = kg/m<sup>2</sup>

<sup>c</sup> Adjusted for sex, BMI, SBP, 2hr post load glucose and smoking status.

<sup>d</sup> Benjamini & Hochberg corrected. Bold type indicates p<0.05.

<sup>e</sup> Adjusted for sex, age, SBP, 2hr post load glucose and smoking status.

<sup>f</sup> The designation of "a" and "b" refers to 2 isomers that were able to be chromatographically separated

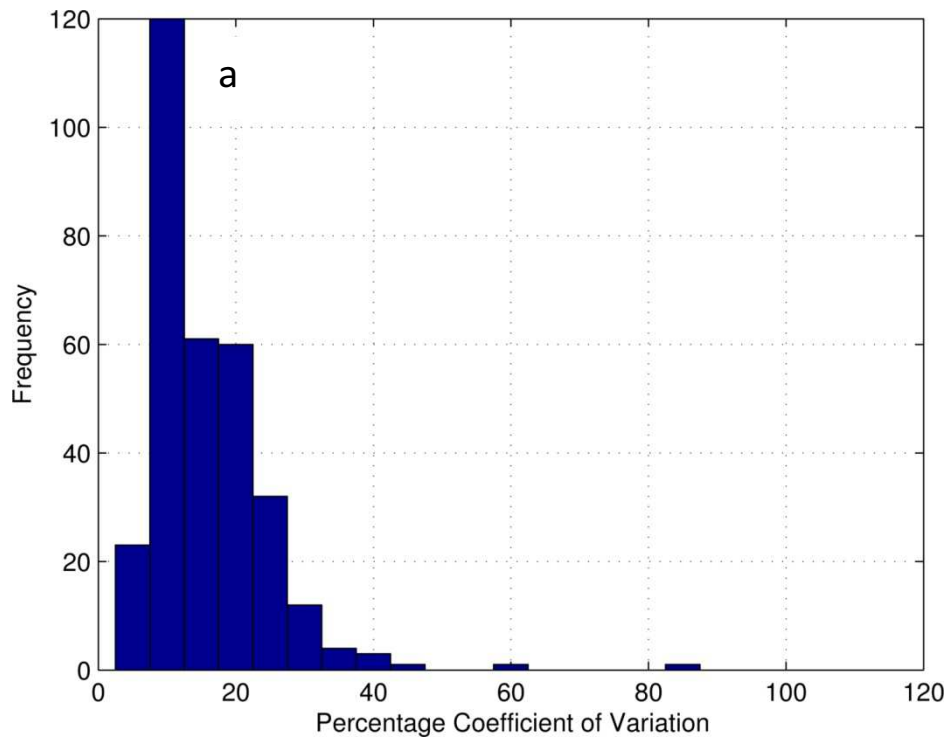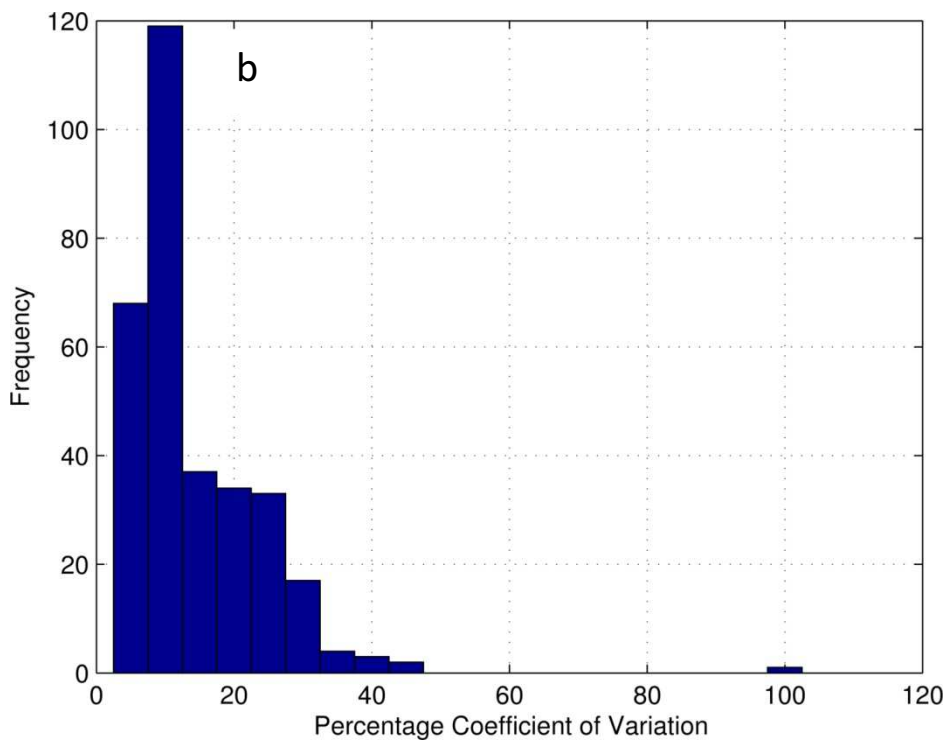

**Supplementary Figure 1.** (a) Intra-run variation; histogram of average %CVs for 312 lipid species over 4 runs. (b) Assay variation; histogram of %CVs for 312 lipid species based on 63 plasma quality control samples over the entire analysis.

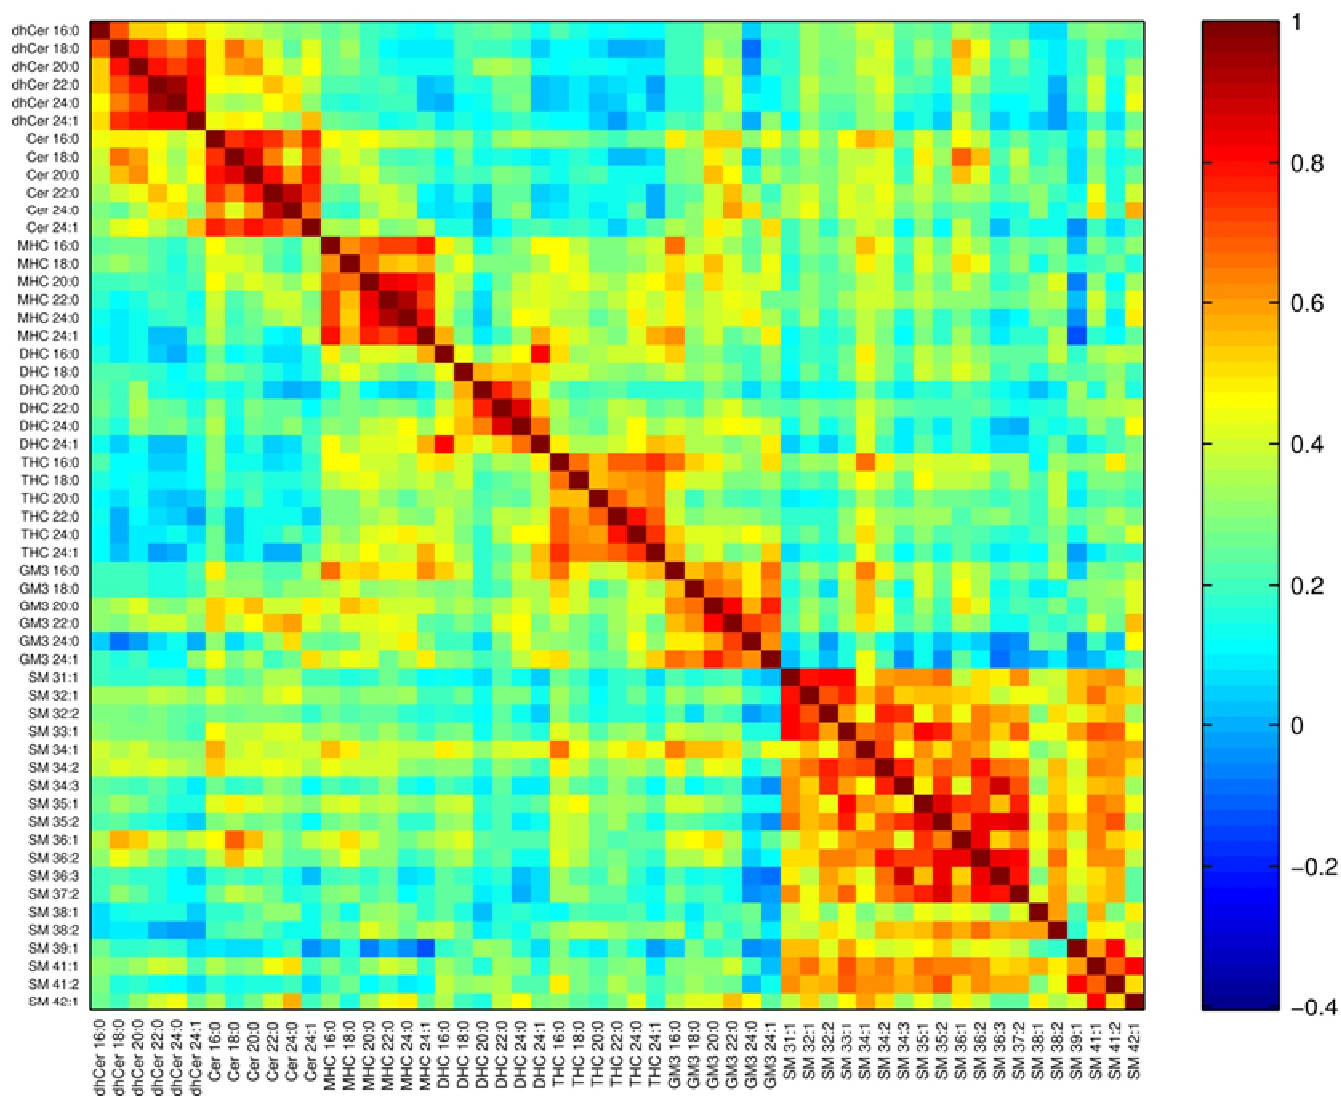

**Supplementary Figure 2.** Pearson's correlations were calculated between all pairs of lipid species. The correlation coefficients are plotted in a heat map. The color scale illustrates the magnitude and direction of correlation between lipid species. Correlation coefficients less than -0.063 or greater than 0.063 were significant ( $p < 0.05$ ).

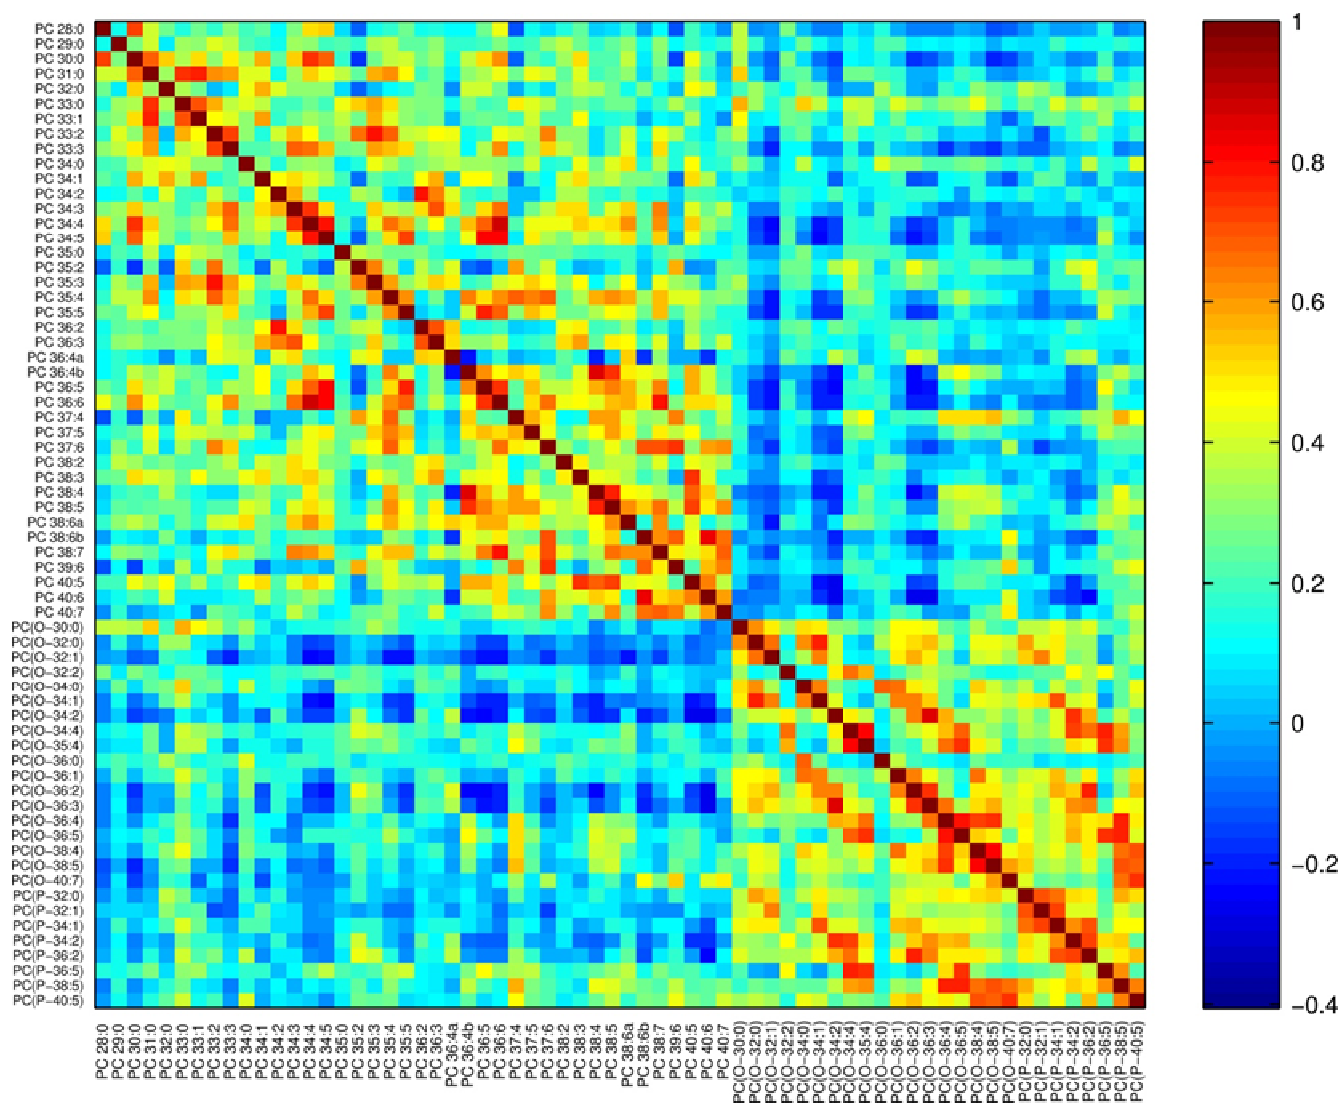

**Supplementary Figure 3.** Pearson's correlations were calculated between all pairs of lipid species. The correlation coefficients are plotted in a heat map. The color scale illustrates the magnitude and direction of correlation between lipid species. Correlation coefficients less than -0.063 or greater than 0.063 were significant ( $p < 0.05$ ).

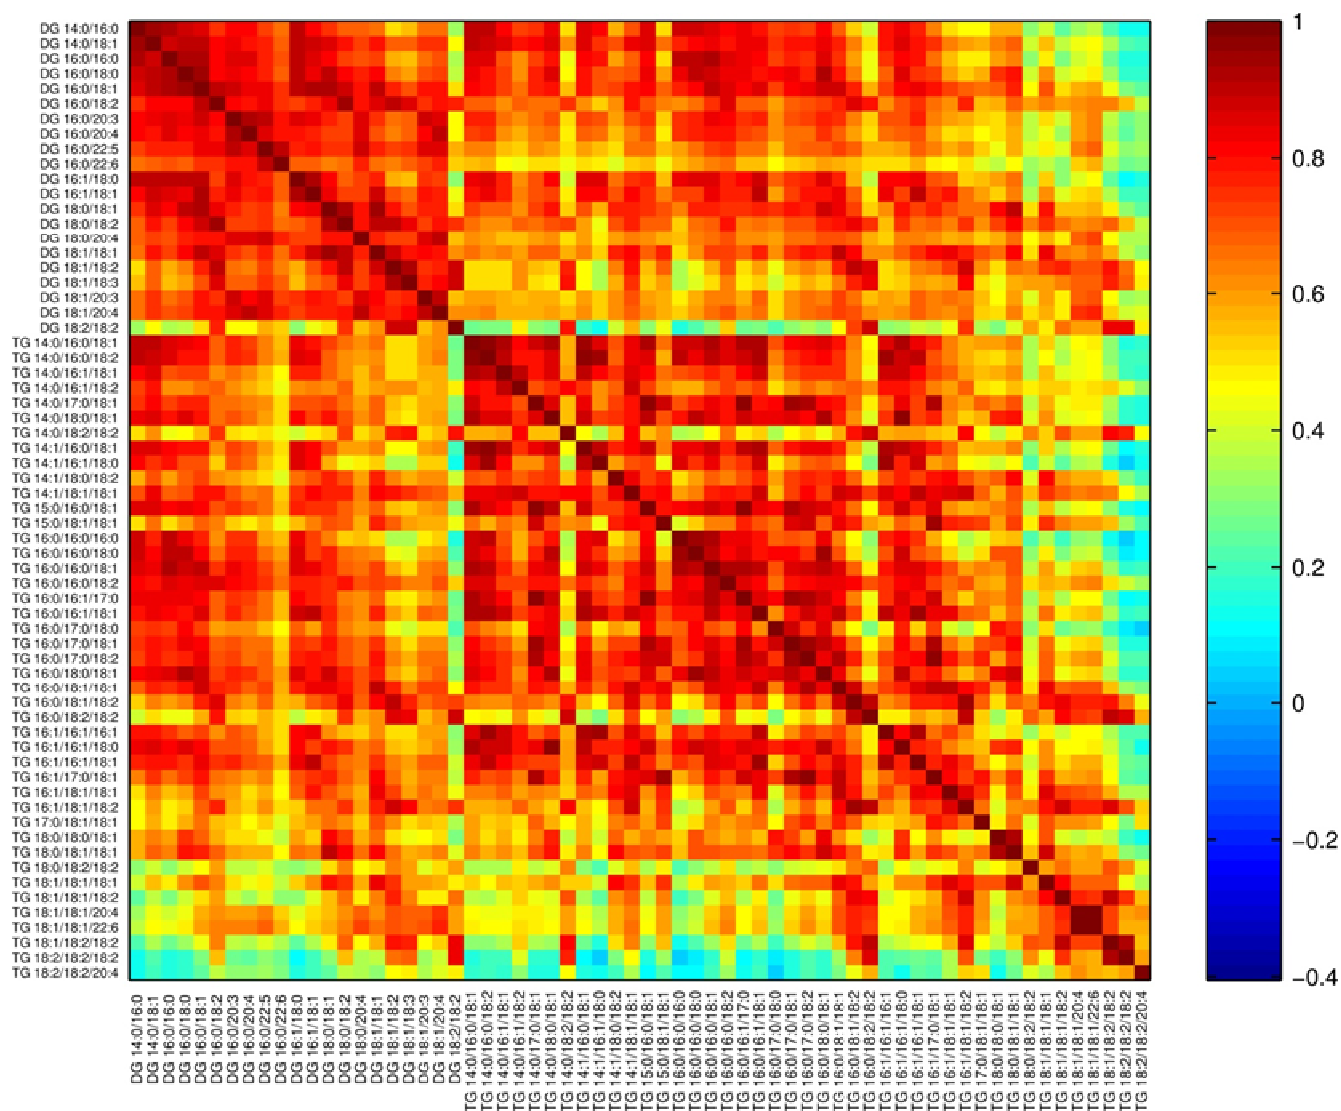

**Supplementary Figure 4.** Pearson's correlations were calculated between all pairs of lipid species. The correlation coefficients are plotted in a heat map. The color scale illustrates the magnitude and direction of correlation between lipid species. Correlation coefficients less than -0.063 or greater than 0.063 were significant ( $p < 0.05$ ).
